# Supplementary material
Source: publisher figshare collection journal article supplement (https://acs.figshare.com/ndownloader/files/15858674)
Supplement: Supplementary file 1 [file 15858674]

---

## SUPPORTING INFORMATION

---

### **Dipyrromethene and $\beta$ -Diketimate Zinc Hydride Complexes: Resemblances and Differences**

Gerd Ballmann, Samuel Grams, Holger Elsen and Sjoerd Harder\*

*Inorganic and Organometallic Chemistry, Friedrich-Alexander-Universität Erlangen-Nürnberg,  
Egerlandstraße 1, 91058 Erlangen, Germany.*

#### **Contents**

|                                                                                    |      |
|------------------------------------------------------------------------------------|------|
| 1) Crystal structure data                                                          | S 2  |
| 2) Selected $^1\text{H}$ , $^{13}\text{C}$ , COSY, HSQC, HMBC and DOSY NMR spectra | S 12 |
| 3) Selected Infrared spectra                                                       | S 29 |
| 4) Catalytic experiments                                                           | S 30 |
| 5) Theoretical calculations                                                        | S 36 |
| 6) References                                                                      | S 37 |

## 1) Crystal structure data

### Crystal structure of <sup>DIPP</sup>DPM-H (3) – hasj180227c

A yellow crystal of <sup>DIPP</sup>DPM-H (3) was embedded in inert perfluoropolyalkylether (viscosity 1800 cSt; ABCR GmbH) and mounted using a Hampton Research CryoLoop. The crystal was then flash cooled to 100 K in a nitrogen gas stream and kept at this temperature during the experiment. The crystal structure was measured on a SuperNova diffractometer with Atlas S2 detector using a CuK $\alpha$  microfocus source. The measured data was processed with the CrysAlisPro software package.<sup>1</sup> Using Olex2<sup>2</sup>, the structure was solved with the ShelXT<sup>3</sup> structure solution program using Intrinsic Phasing and refined with the ShelXL<sup>4</sup> refinement package using Least Squares minimization. All hydrogen atoms were placed in ideal positions and refined as riding atoms with relative isotropic displacement parameters.

Disorder of two *iso*-propyl-groups of the molecule was observed. The relative contributions of the two orientations of each group were refined to ~ 0.50/0.50 and 0.54/0.46, respectively.

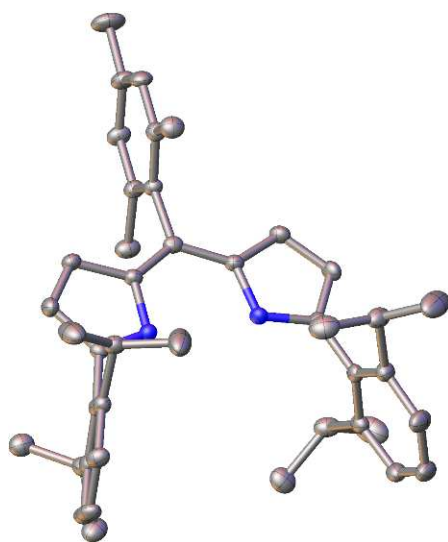

**Figure S1.** ORTEP plot of <sup>DIPP</sup>DPM-H (3) (50% probability)

| <b>Table S1.</b> Crystal data and structure refinement for <sup>DIPP</sup> DPM-H |                                                                |
|----------------------------------------------------------------------------------|----------------------------------------------------------------|
| Identification code                                                              | hasj180227c                                                    |
| Empirical formula                                                                | C <sub>42</sub> H <sub>50</sub> N <sub>2</sub>                 |
| Formula weight                                                                   | 582.84                                                         |
| Temperature/K                                                                    | 100                                                            |
| Crystal system                                                                   | monoclinic                                                     |
| Space group                                                                      | P2 <sub>1</sub> /c                                             |
| a/Å                                                                              | 20.8415(7)                                                     |
| b/Å                                                                              | 16.59310(10)                                                   |
| c/Å                                                                              | 37.3538(12)                                                    |
| α/°                                                                              | 90                                                             |
| β/°                                                                              | 146.605(8)                                                     |
| γ/°                                                                              | 90                                                             |
| Volume/Å <sup>3</sup>                                                            | 7110.1(9)                                                      |
| Z                                                                                | 8                                                              |
| ρ <sub>calc</sub> /g/cm <sup>3</sup>                                             | 1.089                                                          |
| μ/mm <sup>-1</sup>                                                               | 0.467                                                          |
| F(000)                                                                           | 2528.0                                                         |
| Crystal size/mm <sup>3</sup>                                                     | 0.448 × 0.293 × 0.265                                          |
| Crystal color                                                                    | Yellow                                                         |
| Radiation                                                                        | CuKα (λ = 1.54184)                                             |
| 2θ range for data collection/°                                                   | 6.846 to 136.224                                               |
| Index ranges                                                                     | -25 ≤ h ≤ 25, -19 ≤ k ≤ 19, -44 ≤ l ≤ 44                       |
| Reflections collected                                                            | 144252                                                         |
| Independent reflections                                                          | 12926 [R <sub>int</sub> = 0.0399, R <sub>sigma</sub> = 0.0145] |
| Data/restraints/parameters                                                       | 12926/0/857                                                    |
| Goodness-of-fit on F <sup>2</sup>                                                | 1.247                                                          |
| Final R indexes [I >= 2σ (I)]                                                    | R <sub>1</sub> = 0.0714, wR <sub>2</sub> = 0.1529              |
| Final R indexes [all data]                                                       | R <sub>1</sub> = 0.0720, wR <sub>2</sub> = 0.1530              |
| Largest diff. peak/hole / e Å <sup>-3</sup>                                      | 0.47/-0.46                                                     |

### Crystal structure of (<sup>DIPP</sup>DPM)ZnEt (**4**) – hasj171130a

An orange crystal of (<sup>DIPP</sup>DPM)ZnEt (**4**) was embedded in inert perfluoropolyalkylether (viscosity 1800 cSt; ABCR GmbH) and mounted using a Hampton Research CryoLoop. The crystal was then flash cooled to 100 K in a nitrogen gas stream and kept at this temperature during the experiment. The crystal structure was measured on a SuperNova diffractometer with Atlas S2 detector using a CuK $\alpha$  microfocus source. The measured data was processed with the CrysAlisPro software package.<sup>1</sup> Using Olex2<sup>2</sup>, the structure was solved with the ShelXT<sup>3</sup> structure solution program using Intrinsic Phasing and refined with the ShelXL<sup>4</sup> refinement package using Least Squares minimization. All hydrogen atoms were placed in ideal positions and refined as riding atoms with relative isotropic displacement parameters.

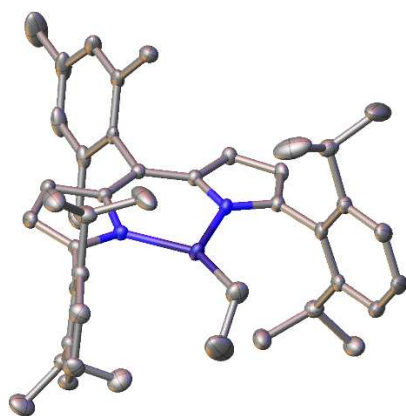

**Figure S2.** ORTEP plot of (<sup>DIPP</sup>DPM)ZnEt (**4**) (50% probability)

| <b>Table S2.</b> Crystal data and structure refinement for (D <sup>IPP</sup> DPM)ZnEt |                                                               |
|---------------------------------------------------------------------------------------|---------------------------------------------------------------|
| Identification code                                                                   | hasj171130a                                                   |
| Empirical formula                                                                     | C <sub>44</sub> H <sub>54</sub> N <sub>2</sub> Zn             |
| Formula weight                                                                        | 676.26                                                        |
| Temperature/K                                                                         | 100                                                           |
| Crystal system                                                                        | Monoclinic                                                    |
| Space group                                                                           | P2 <sub>1</sub> /n                                            |
| a/Å                                                                                   | 10.99150(10)                                                  |
| b/Å                                                                                   | 18.6458(2)                                                    |
| c/Å                                                                                   | 18.5626(2)                                                    |
| α/°                                                                                   | 90                                                            |
| β/°                                                                                   | 93.2860(10)                                                   |
| γ/°                                                                                   | 90                                                            |
| Volume/Å <sup>3</sup>                                                                 | 3798.06(7)                                                    |
| Z                                                                                     | 4                                                             |
| ρ <sub>calc</sub> /g/cm <sup>3</sup>                                                  | 1.183                                                         |
| μ/mm <sup>-1</sup>                                                                    | 1.119                                                         |
| F(000)                                                                                | 1448.0                                                        |
| Crystal size/mm <sup>3</sup>                                                          | 0.662 × 0.499 × 0.345                                         |
| Crystal color                                                                         | Orange                                                        |
| Radiation                                                                             | CuKα (λ = 1.54184)                                            |
| 2θ range for data collection/°                                                        | 6.724 to 136.194                                              |
| Index ranges                                                                          | -12 ≤ h ≤ 13, -22 ≤ k ≤ 22, -22 ≤ l ≤ 22                      |
| Reflections collected                                                                 | 25241                                                         |
| Independent reflections                                                               | 6918 [R <sub>int</sub> = 0.0208, R <sub>sigma</sub> = 0.0170] |
| Data/restraints/parameters                                                            | 6918/0/436                                                    |
| Goodness-of-fit on F <sup>2</sup>                                                     | 1.096                                                         |
| Final R indexes [I ≥ 2σ (I)]                                                          | R <sub>1</sub> = 0.0422, wR <sub>2</sub> = 0.1078             |
| Final R indexes [all data]                                                            | R <sub>1</sub> = 0.0434, wR <sub>2</sub> = 0.1086             |
| Largest diff. peak/hole / e Å <sup>-3</sup>                                           | 0.85/-0.71                                                    |

### Crystal structure of (<sup>DIPP</sup>DPM)ZnI (5) – hasj180109b

An orange crystal of (<sup>DIPP</sup>DPM)ZnEt (5) was embedded in inert perfluoropolyalkylether (viscosity 1800 cSt; ABCR GmbH) and mounted using a Hampton Research CryoLoop. The crystal was then flash cooled to 100 K in a nitrogen gas stream and kept at this temperature during the experiment. The crystal structure was measured on a SuperNova diffractometer with Atlas S2 detector using a CuK $\alpha$  microfocus source. The measured data was processed with the CrysAlisPro software package.<sup>1</sup> Using Olex2<sup>2</sup>, the structure was solved with the ShelXT<sup>3</sup> structure solution program using Intrinsic Phasing and refined with the ShelXL<sup>4</sup> refinement package using Least Squares minimization. All hydrogen atoms were placed in ideal positions and refined as riding atoms with relative isotropic displacement parameters.

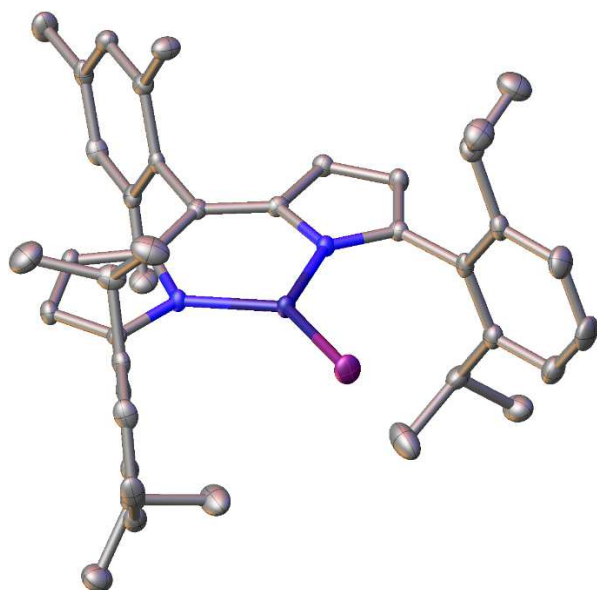

**Figure S3.** ORTEP plot of (<sup>DIPP</sup>DPM)ZnI (5) (50% probability)

| <b>Table S3.</b> Crystal data and structure refinement for ( <sup>DIPP</sup> DPM)ZnI |                                                               |
|--------------------------------------------------------------------------------------|---------------------------------------------------------------|
| Identification code                                                                  | hasj180109b                                                   |
| Empirical formula                                                                    | C <sub>42</sub> H <sub>49</sub> IN <sub>2</sub> Zn            |
| Formula weight                                                                       | 774.10                                                        |
| Temperature/K                                                                        | 100                                                           |
| Crystal system                                                                       | Monoclinic                                                    |
| Space group                                                                          | P2 <sub>1</sub> /c                                            |
| a/Å                                                                                  | 11.2471(5)                                                    |
| b/Å                                                                                  | 23.0104(10)                                                   |
| c/Å                                                                                  | 15.5386(6)                                                    |
| α/°                                                                                  | 90                                                            |
| β/°                                                                                  | 108.881(5)                                                    |
| γ/°                                                                                  | 90                                                            |
| Volume/Å <sup>3</sup>                                                                | 3805.0(3)                                                     |
| Z                                                                                    | 4                                                             |
| ρ <sub>calc</sub> /g/cm <sup>3</sup>                                                 | 1.351                                                         |
| μ/mm <sup>-1</sup>                                                                   | 1.487                                                         |
| F(000)                                                                               | 1592.0                                                        |
| Crystal size/mm <sup>3</sup>                                                         | 0.616 × 0.498 × 0.347                                         |
| Crystal color                                                                        | Orange                                                        |
| Radiation                                                                            | CuKα (λ = 1.54184)                                            |
| 2θ range for data collection/°                                                       | 5.99 to 56.122                                                |
| Index ranges                                                                         | -14 ≤ h ≤ 14, -27 ≤ k ≤ 30, -20 ≤ l ≤ 20                      |
| Reflections collected                                                                | 33121                                                         |
| Independent reflections                                                              | 8955 [R <sub>int</sub> = 0.0480, R <sub>sigma</sub> = 0.0446] |
| Data/restraints/parameters                                                           | 8955/0/426                                                    |
| Goodness-of-fit on F <sup>2</sup>                                                    | 1.077                                                         |
| Final R indexes [I ≥ 2σ (I)]                                                         | R <sub>1</sub> = 0.0391, wR <sub>2</sub> = 0.0903             |
| Final R indexes [all data]                                                           | R <sub>1</sub> = 0.0482, wR <sub>2</sub> = 0.0969             |
| Largest diff. peak/hole / e Å <sup>-3</sup>                                          | 1.22/-0.84                                                    |

### Crystal structure of (<sup>DIPP</sup>DPM)ZnH (**6**) – hasj160209a

An orange crystal of (<sup>DIPP</sup>DPM)ZnH (**6**) was embedded in inert perfluoropolyalkylether (viscosity 1800 cSt; ABCR GmbH) and mounted using a Hampton Research CryoLoop. The crystal was then flash cooled to 100 K in a nitrogen gas stream and kept at this temperature during the experiment. The crystal structure was measured on a SuperNova diffractometer with Atlas S2 detector using a CuK $\alpha$  microfocus source. The measured data was processed with the CrysAlisPro software package.<sup>1</sup> Using Olex2<sup>2</sup>, the structure was solved with the ShelXT<sup>3</sup> structure solution program using Intrinsic Phasing and refined with the ShelXL<sup>4</sup> refinement package using Least Squares minimization. Except of the Zn-H hydrogen atom, all hydrogen atoms were placed in ideal positions and refined as riding atoms with relative isotropic displacement parameters. The position of the Zn-H hydrogen atom was observed from difference Fourier maps and refined.

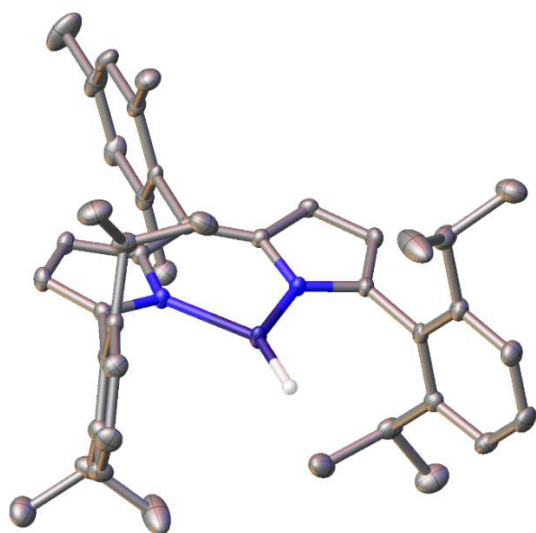

**Figure S4.** ORTEP plot of (<sup>DIPP</sup>DPM)ZnH (**6**) (50% probability)



| <b>Table S4.</b> Crystal data and structure refinement for ( <sup>DIPP</sup> DPM)ZnH |                                                               |
|--------------------------------------------------------------------------------------|---------------------------------------------------------------|
| Identification code                                                                  | hasj160209a                                                   |
| Empirical formula                                                                    | C <sub>42</sub> H <sub>50</sub> N <sub>2</sub> Zn             |
| Formula weight                                                                       | 648.21                                                        |
| Temperature/K                                                                        | 100                                                           |
| Crystal system                                                                       | Monoclinic                                                    |
| Space group                                                                          | C2/c                                                          |
| a/Å                                                                                  | 18.87443(19)                                                  |
| b/Å                                                                                  | 18.08080(19)                                                  |
| c/Å                                                                                  | 10.80881(11)                                                  |
| α/°                                                                                  | 90                                                            |
| β/°                                                                                  | 94.9310(9)                                                    |
| γ/°                                                                                  | 90                                                            |
| Volume/Å <sup>3</sup>                                                                | 3675.01(6)                                                    |
| Z                                                                                    | 4                                                             |
| ρ <sub>calc</sub> /cm <sup>3</sup>                                                   | 1.172                                                         |
| μ/mm <sup>-1</sup>                                                                   | 2.098                                                         |
| F(000)                                                                               | 1384.0                                                        |
| Crystal size/mm <sup>3</sup>                                                         | 0.431 × 0.2423 × 0.1438                                       |
| Crystal color                                                                        | Orange                                                        |
| Radiation                                                                            | CuKα (λ = 1.54184)                                            |
| 2θ range for data collection/°                                                       | 6.782 to 136.216                                              |
| Index ranges                                                                         | -22 ≤ h ≤ 22, -21 ≤ k ≤ 21, -13 ≤ l ≤ 12                      |
| Reflections collected                                                                | 19764                                                         |
| Independent reflections                                                              | 3355 [R <sub>int</sub> = 0.0337, R <sub>sigma</sub> = 0.0165] |
| Data/restraints/parameters                                                           | 3355/0/214                                                    |
| Goodness-of-fit on F <sup>2</sup>                                                    | 1.056                                                         |
| Final R indexes [I ≥ 2σ (I)]                                                         | R <sub>1</sub> = 0.0301, wR <sub>2</sub> = 0.0781             |
| Final R indexes [all data]                                                           | R <sub>1</sub> = 0.0305, wR <sub>2</sub> = 0.0784             |
| Largest diff. peak/hole / e Å <sup>-3</sup>                                          | 0.33/-0.35                                                    |

### Crystal structure of (<sup>DIPP</sup>DPM)ZnO<sub>2</sub>CH (7) – hasj170920a

An orange crystal of (<sup>DIPP</sup>DPM)ZnO<sub>2</sub>CH (7) was embedded in inert perfluoropolyalkylether (viscosity 1800 cSt; ABCR GmbH) and mounted using a Hampton Research CryoLoop. The crystal was then flash cooled to 100 K in a nitrogen gas stream and kept at this temperature during the experiment. The crystal structure was measured on a SuperNova diffractometer with Atlas S2 detector using a CuK $\alpha$  microfocus source. The measured data was processed with the CrysAlisPro software package.<sup>1</sup> Using Olex2<sup>2</sup>, the structure was solved with the ShelXT<sup>3</sup> structure solution program using Intrinsic Phasing and refined with the ShelXL<sup>4</sup> refinement package using Least Squares minimization. All hydrogen atoms were placed in ideal positions and refined as riding atoms with relative isotropic displacement parameters.

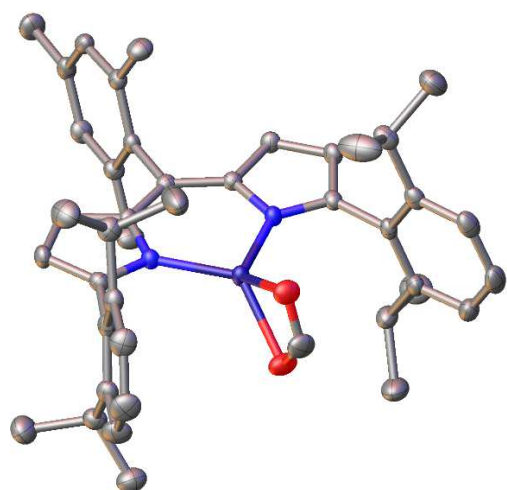

**Figure S5.** ORTEP plot of (<sup>DIPP</sup>DPM)ZnO<sub>2</sub>CH (7) (50% probability)

| <b>Table S5.</b> Crystal data and structure refinement for ( <sup>DIPP</sup> DPM)ZnO <sub>2</sub> CH |                                                                  |
|------------------------------------------------------------------------------------------------------|------------------------------------------------------------------|
| Identification code                                                                                  | hasj170920a                                                      |
| Empirical formula                                                                                    | C <sub>43</sub> H <sub>50</sub> N <sub>2</sub> O <sub>2</sub> Zn |
| Formula weight                                                                                       | 692.22                                                           |
| Temperature/K                                                                                        | 100                                                              |
| Crystal system                                                                                       | Monoclinic                                                       |
| Space group                                                                                          | P2 <sub>1</sub> /c                                               |
| a/Å                                                                                                  | 11.43330(10)                                                     |
| b/Å                                                                                                  | 22.9394(3)                                                       |
| c/Å                                                                                                  | 15.4127(2)                                                       |
| α/°                                                                                                  | 90                                                               |
| β/°                                                                                                  | 108.0040(10)                                                     |
| γ/°                                                                                                  | 90                                                               |
| Volume/Å <sup>3</sup>                                                                                | 3844.40(8)                                                       |
| Z                                                                                                    | 4                                                                |
| ρ <sub>calc</sub> /g/cm <sup>3</sup>                                                                 | 1.196                                                            |
| μ/mm <sup>-1</sup>                                                                                   | 1.159                                                            |
| F(000)                                                                                               | 1472.0                                                           |
| Crystal size/mm <sup>3</sup>                                                                         | 0.57 × 0.487 × 0.132                                             |
| Crystal color                                                                                        | Orange                                                           |
| Radiation                                                                                            | CuKα (λ = 1.54184)                                               |
| 2θ range for data collection/°                                                                       | 7.156 to 136.232                                                 |
| Index ranges                                                                                         | -13 ≤ h ≤ 13, -19 ≤ k ≤ 27, -18 ≤ l ≤ 15                         |
| Reflections collected                                                                                | 21531                                                            |
| Independent reflections                                                                              | 7024 [R <sub>int</sub> = 0.0282, R <sub>sigma</sub> = 0.0270]    |
| Data/restraints/parameters                                                                           | 7024/0/448                                                       |
| Goodness-of-fit on F <sup>2</sup>                                                                    | 1.024                                                            |
| Final R indexes [I ≥ 2σ (I)]                                                                         | R <sub>1</sub> = 0.0325, wR <sub>2</sub> = 0.0833                |
| Final R indexes [all data]                                                                           | R <sub>1</sub> = 0.0367, wR <sub>2</sub> = 0.0867                |
| Largest diff. peak/hole / e Å <sup>-3</sup>                                                          | 0.33/-0.41                                                       |

## 2) Selected $^1\text{H}$ , $^{13}\text{C}$ , COSY, HSQC, HMBC, DOSY and temperature-dependant NMR spectra

**Figure S6.**  $^1\text{H}$  and  $^{13}\text{C}$  spectra of 2-(2,6-di-*iso*-propylphenyl)-1H-pyrrole (**1**) in  $\text{CDCl}_3$  (\*).

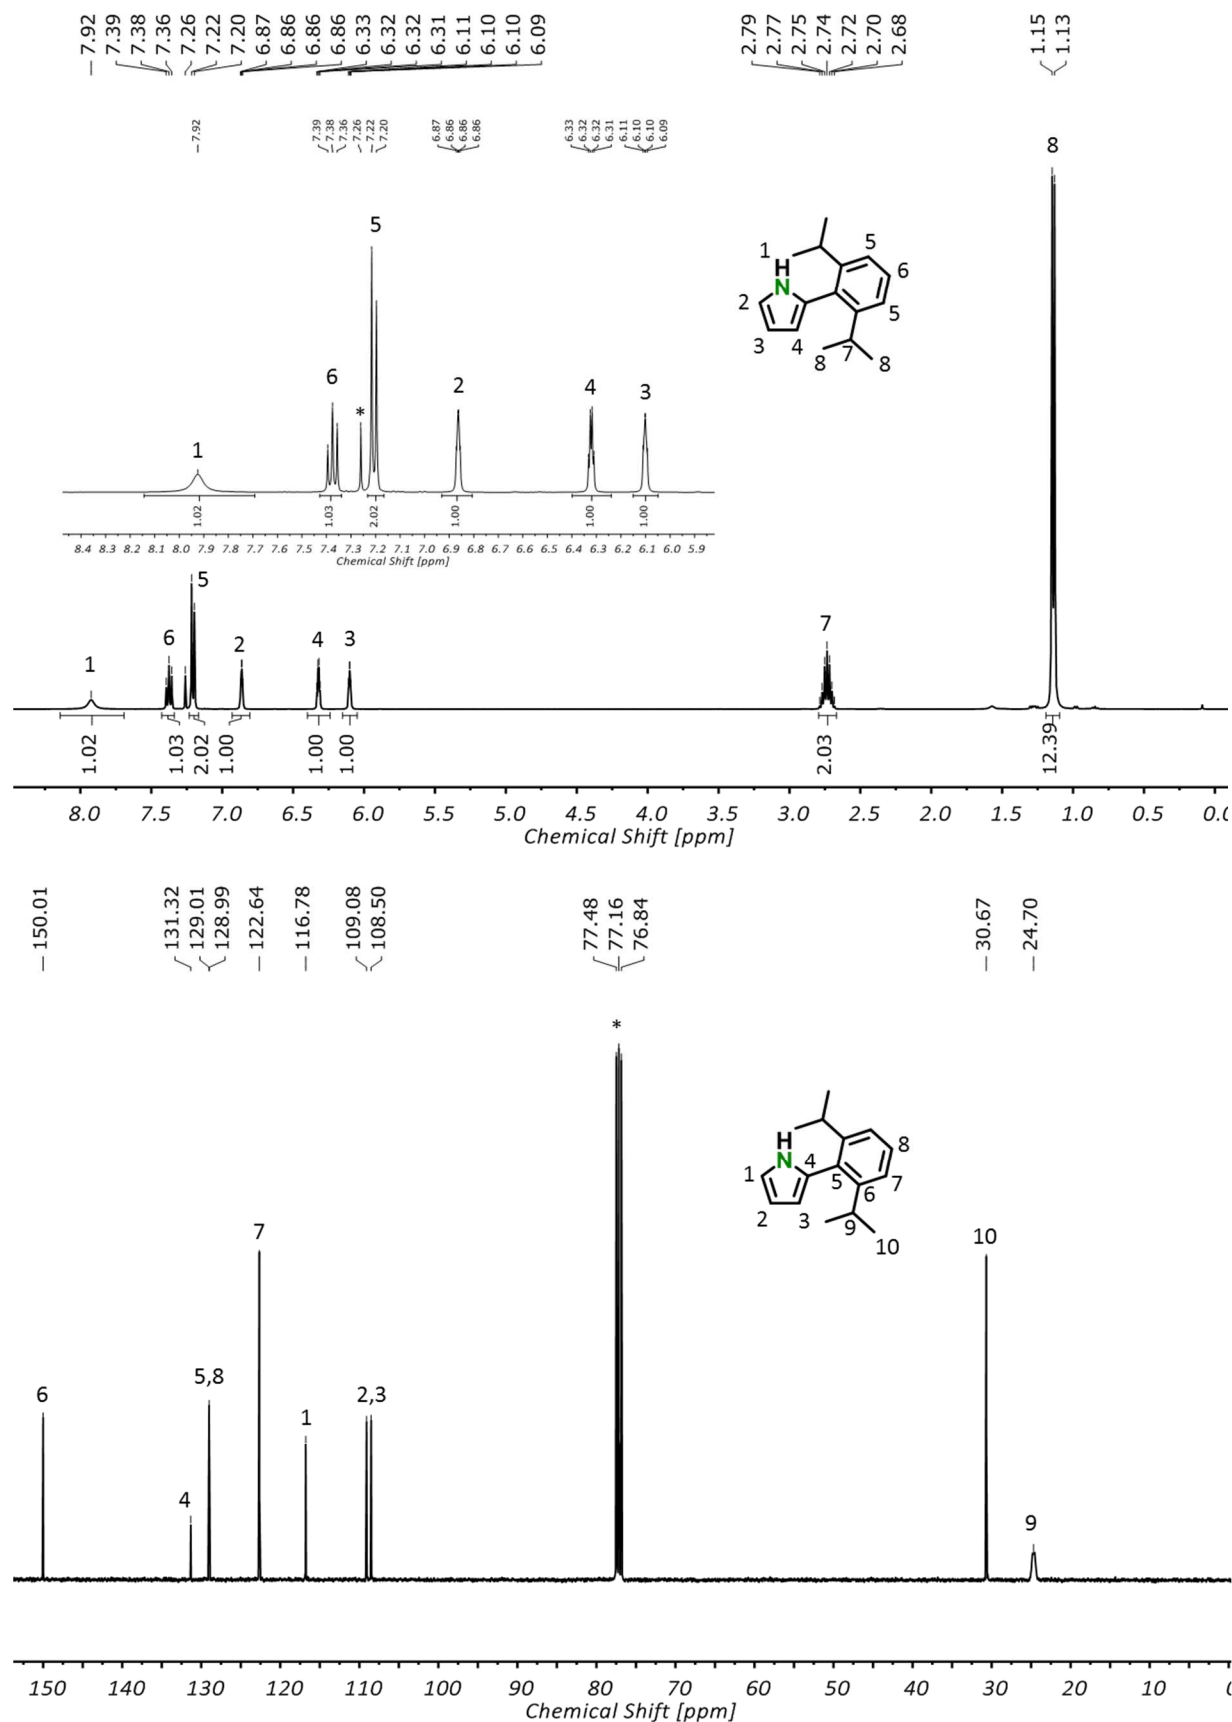

**Figure S7.**  $^1\text{H}$  and  $^{13}\text{C}$  NMR spectra of 1,9-di-*iso*-propylphenyl-5-mesityldipyrromethane (**2**) in  $\text{CDCl}_3$  (\*).

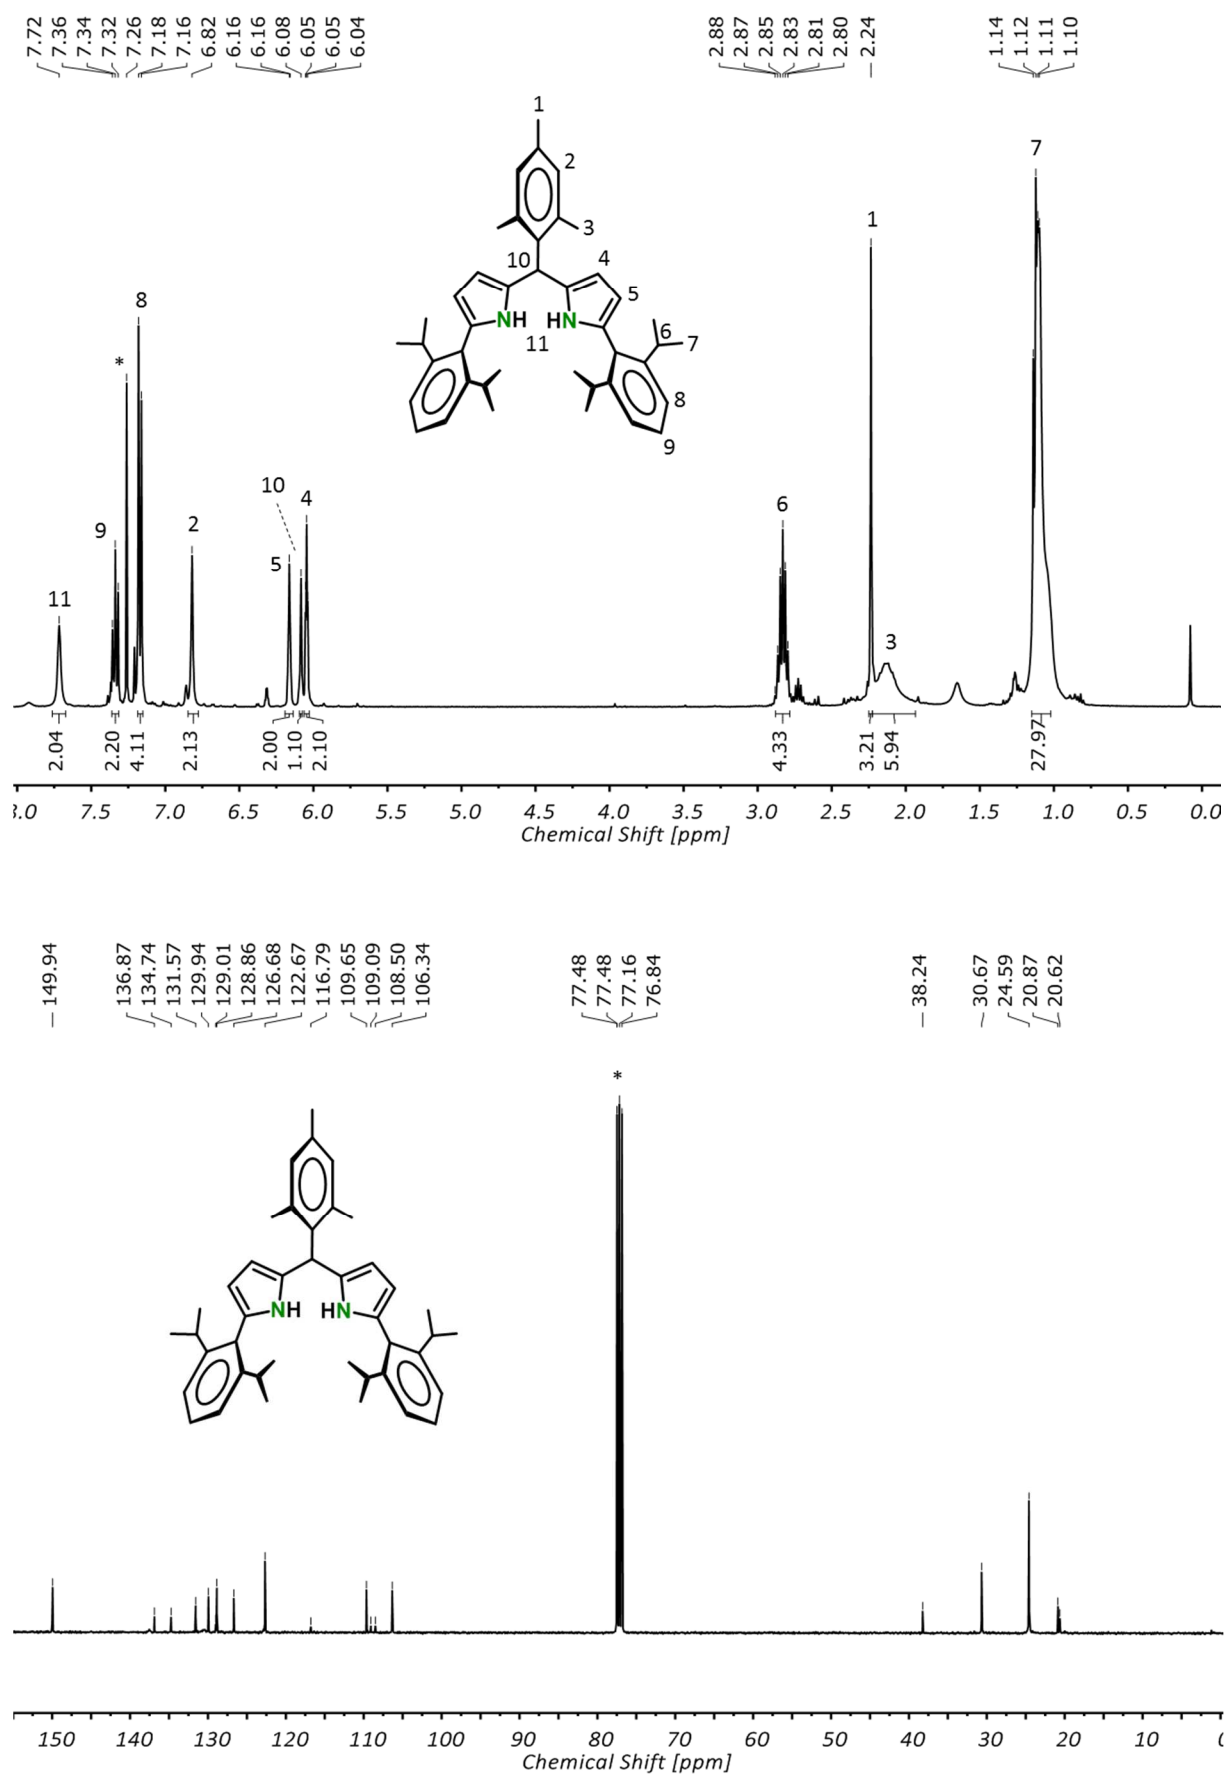

**Figure S8.**  $^1\text{H}$  and  $^{13}\text{C}$  spectra of  $\text{DIP}^{\text{P}}$ DPM-H (**3**) in benzene- $d_6$  (\*).

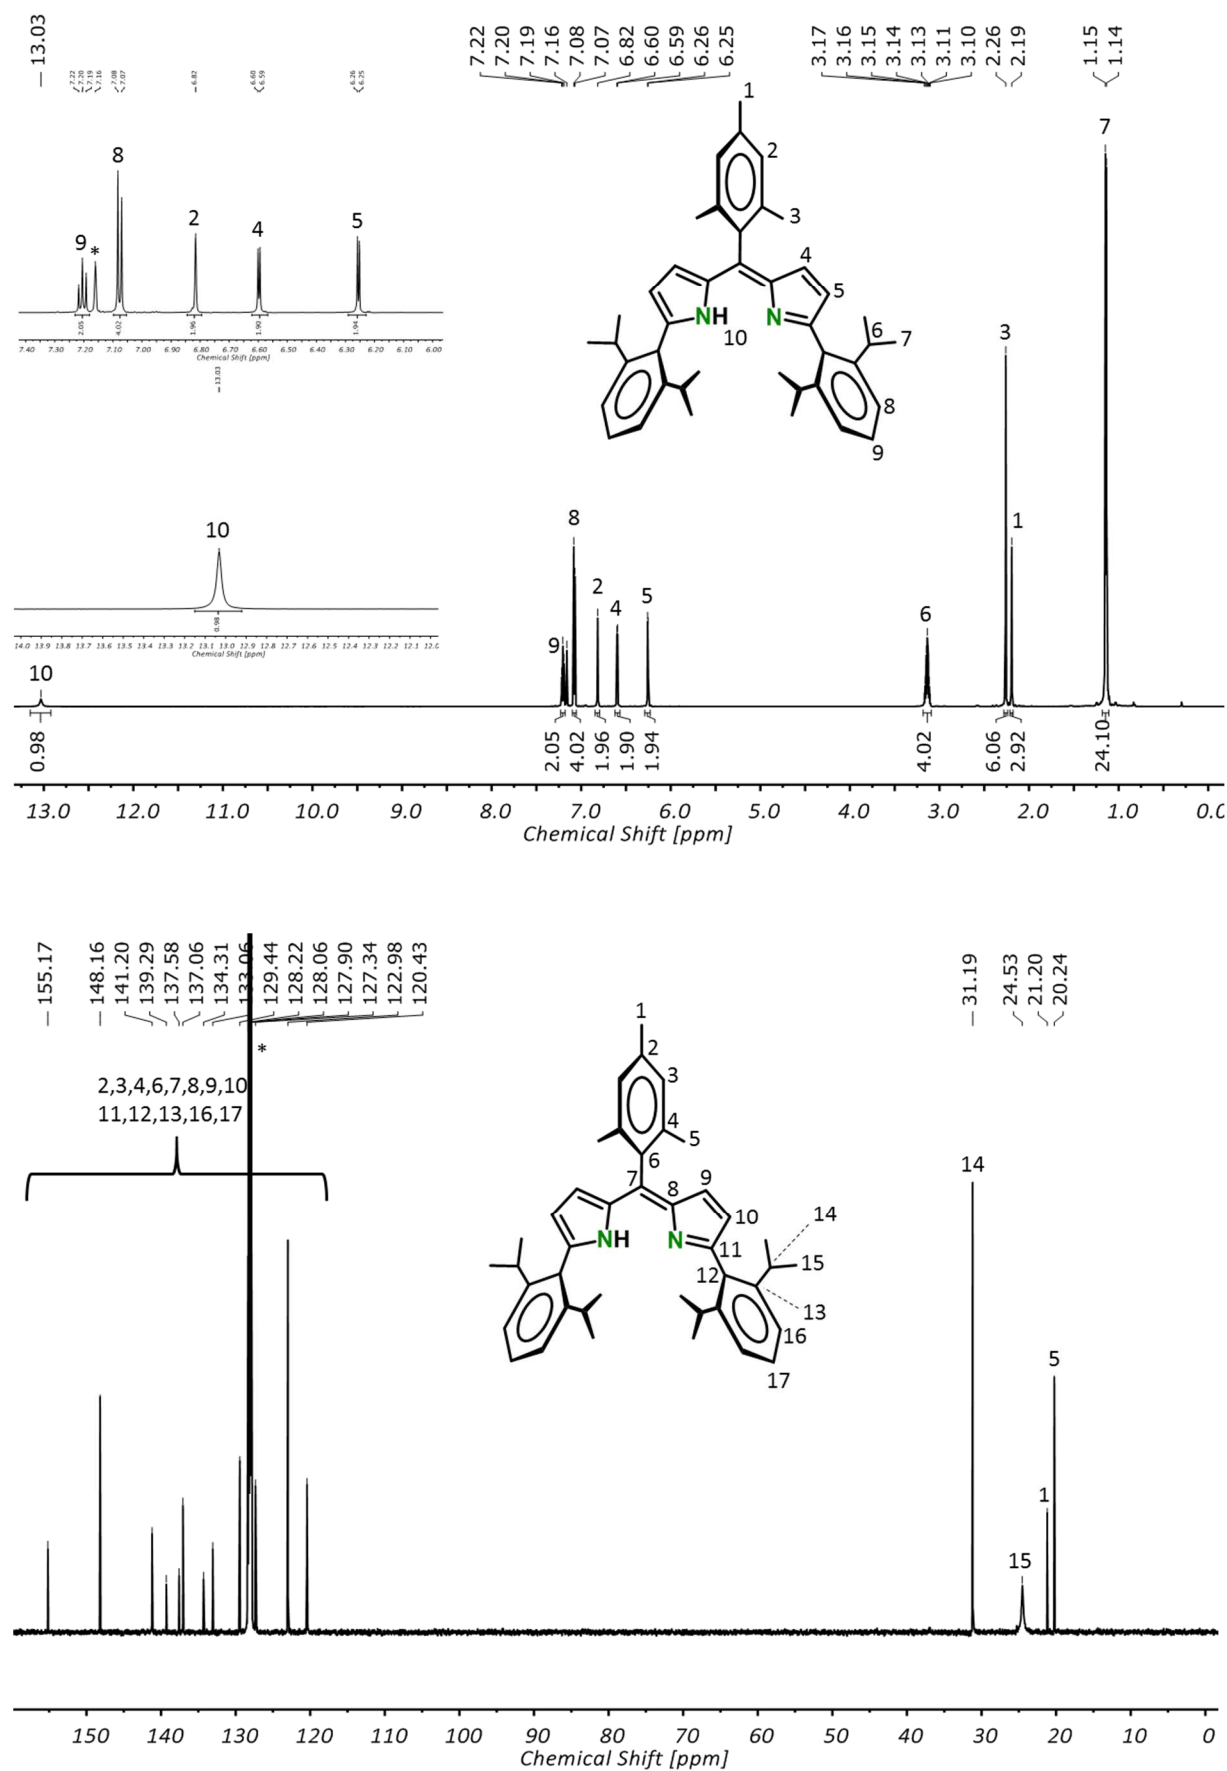

**Figure S9.**  $^1\text{H}$ ,  $^{13}\text{C}$ , COSY, HSQC and HMBC spectra of ( $^{\text{DIPP}}$ DPM)ZnEt (**4**) in benzene- $d_6$  (\*).

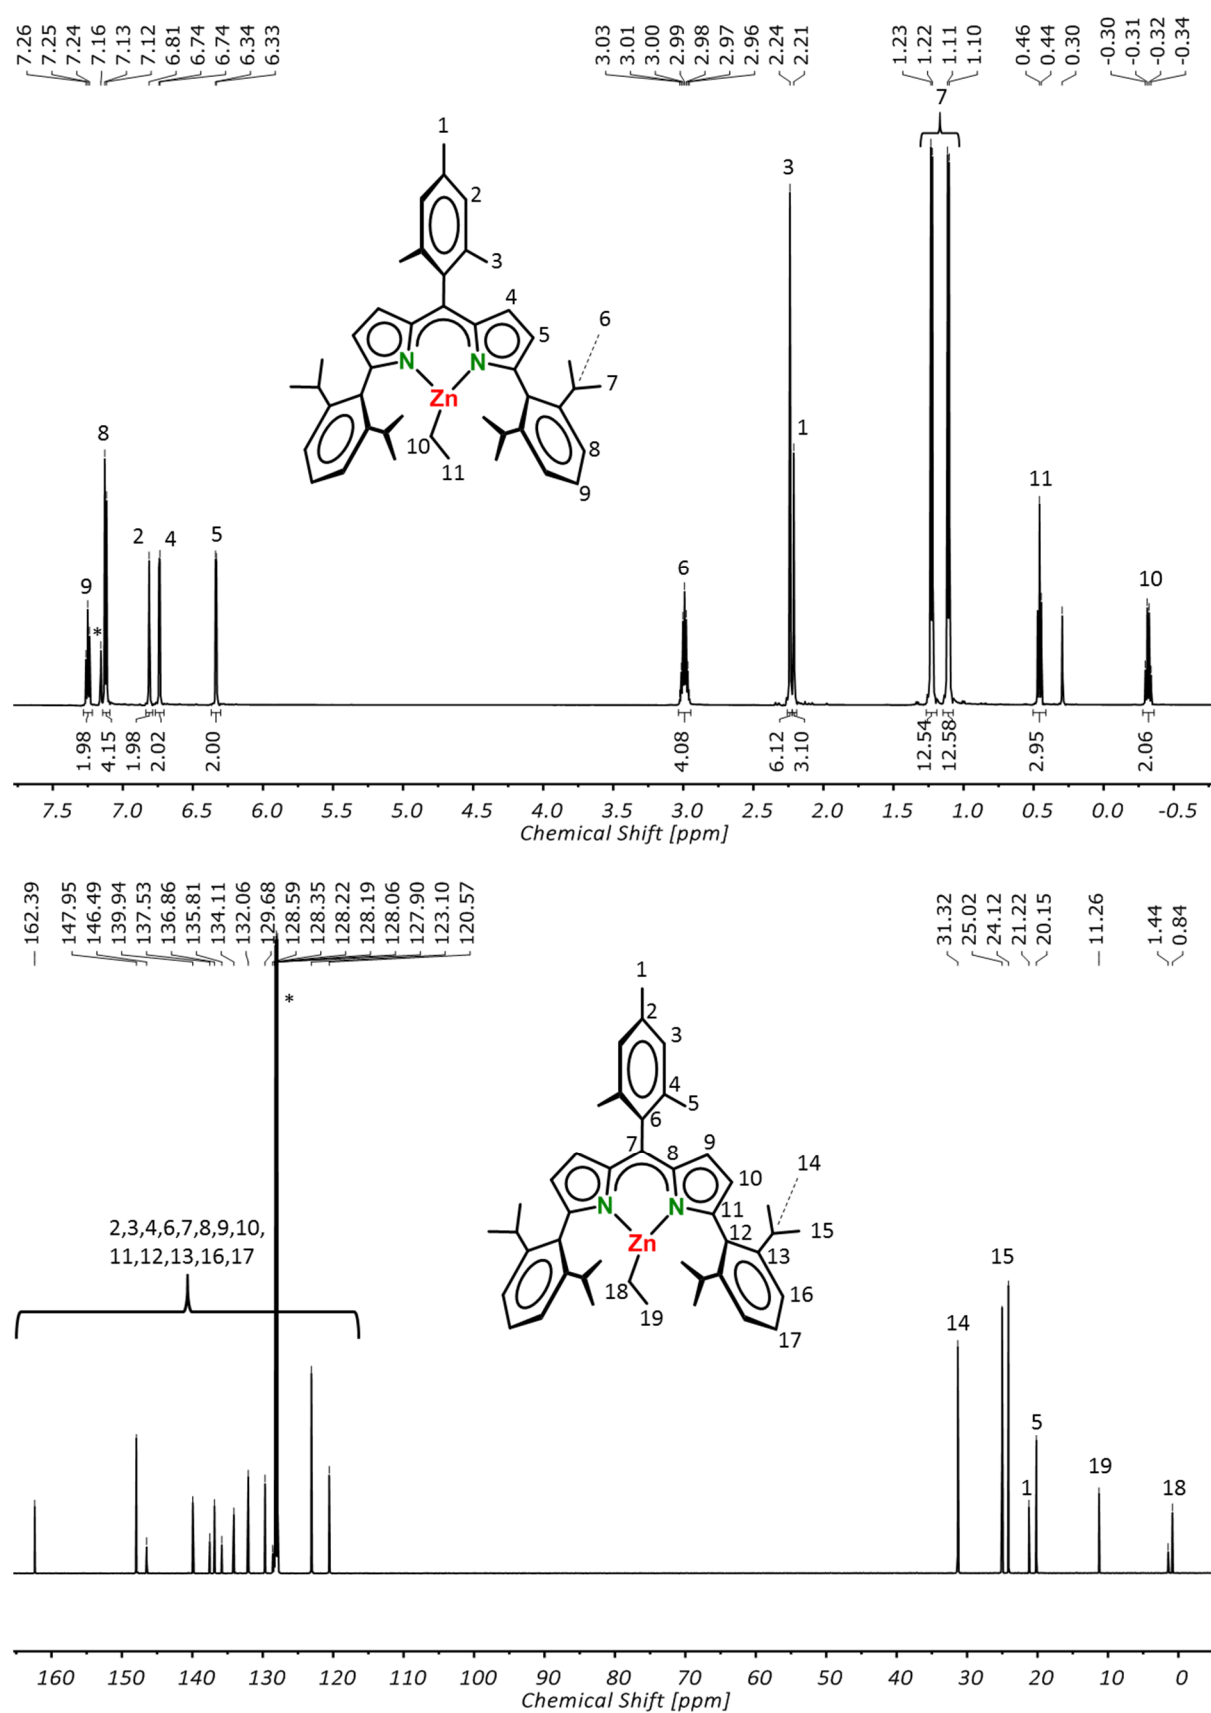

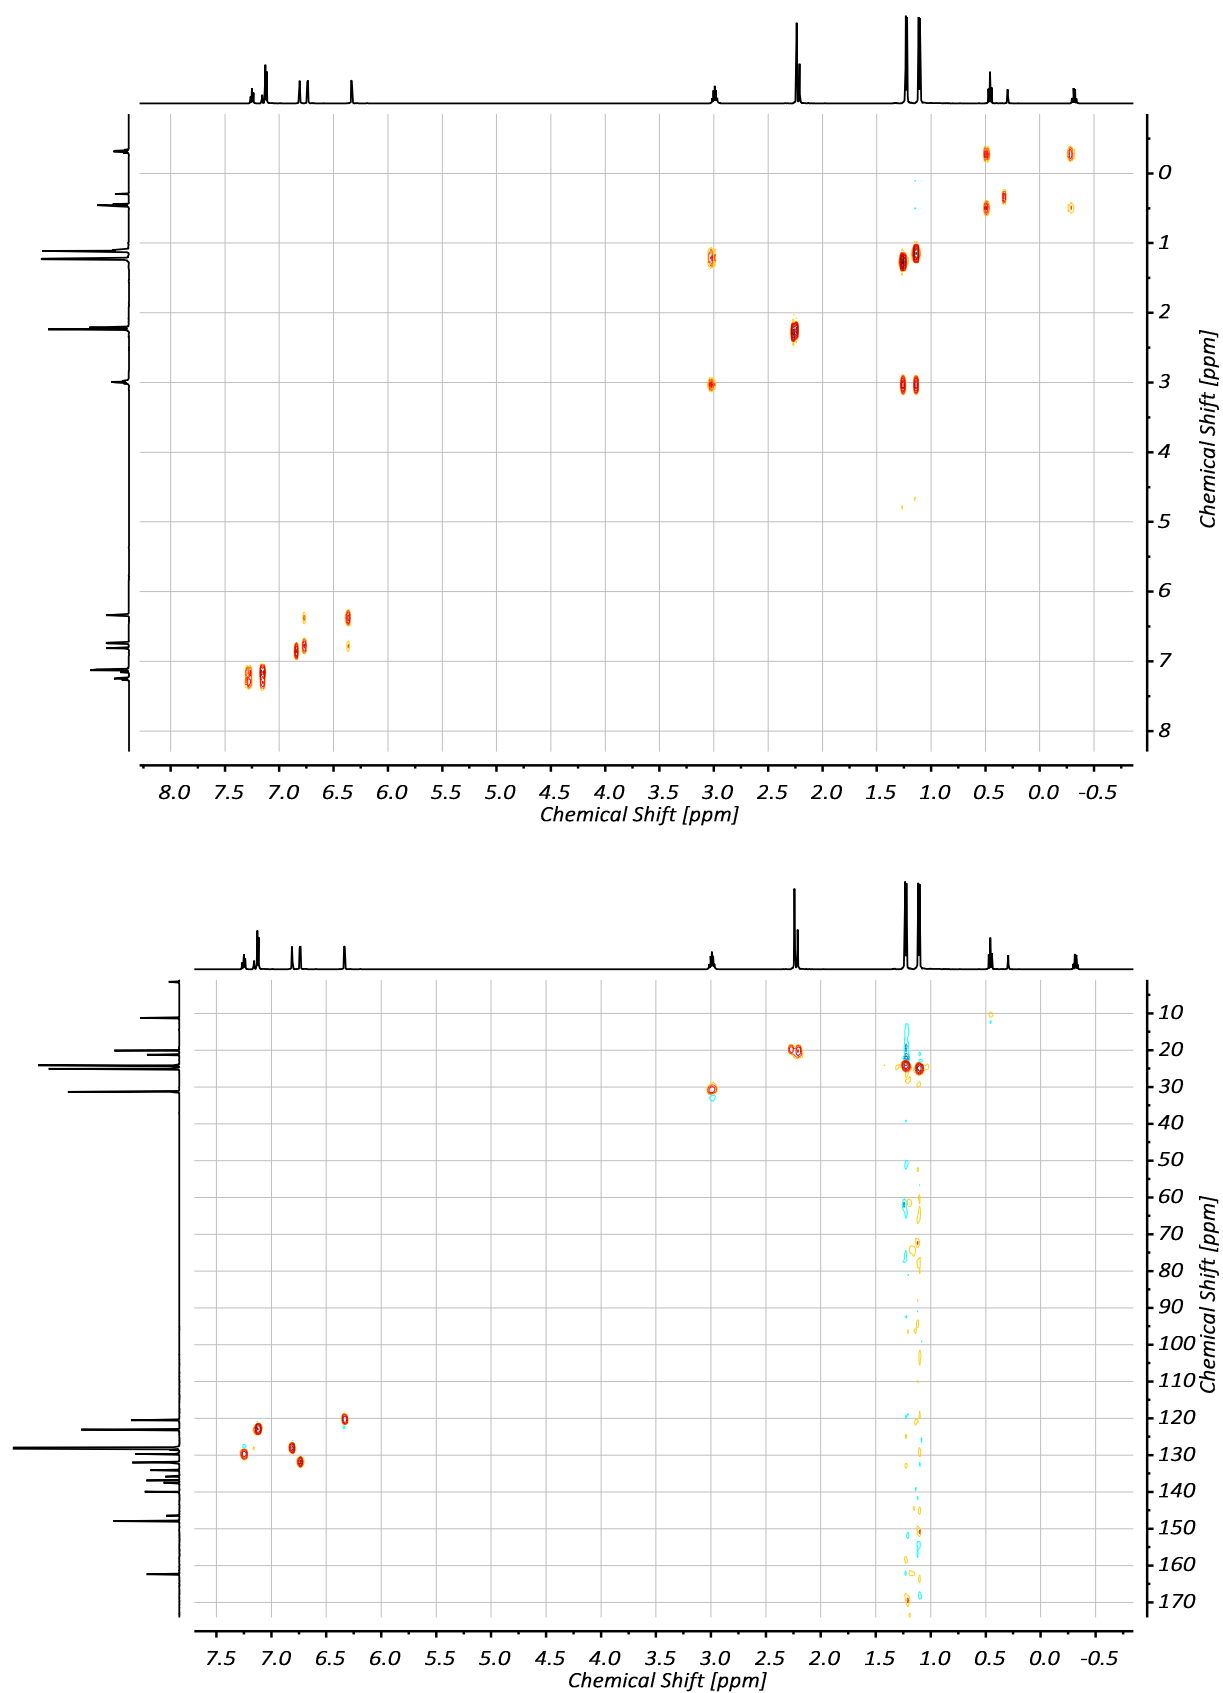



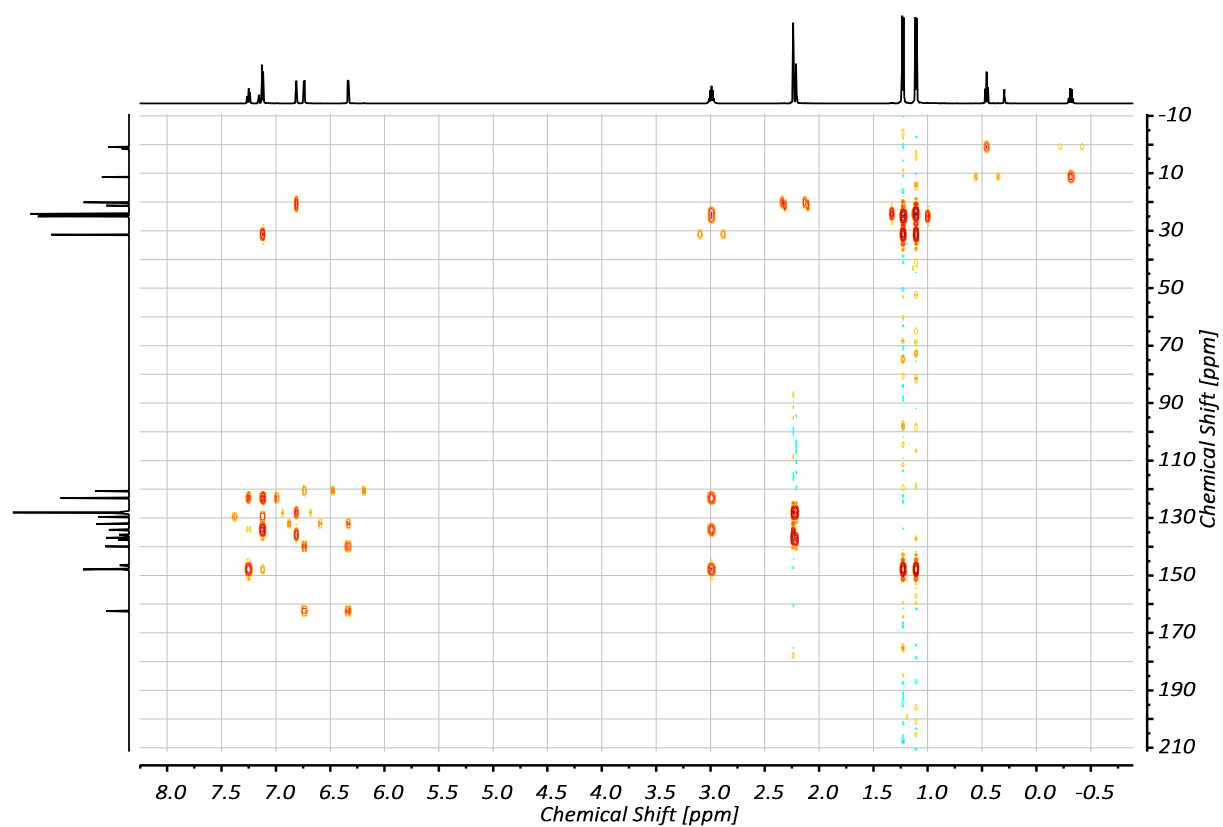

**Figure S10.**  $^1\text{H}$ ,  $^{13}\text{C}$ , COSY, HSQC and HMBC spectra of  $(^{\text{DIPP}}\text{DPM})\text{ZnI}$  (**5**) in benzene- $d_6$  (\*).

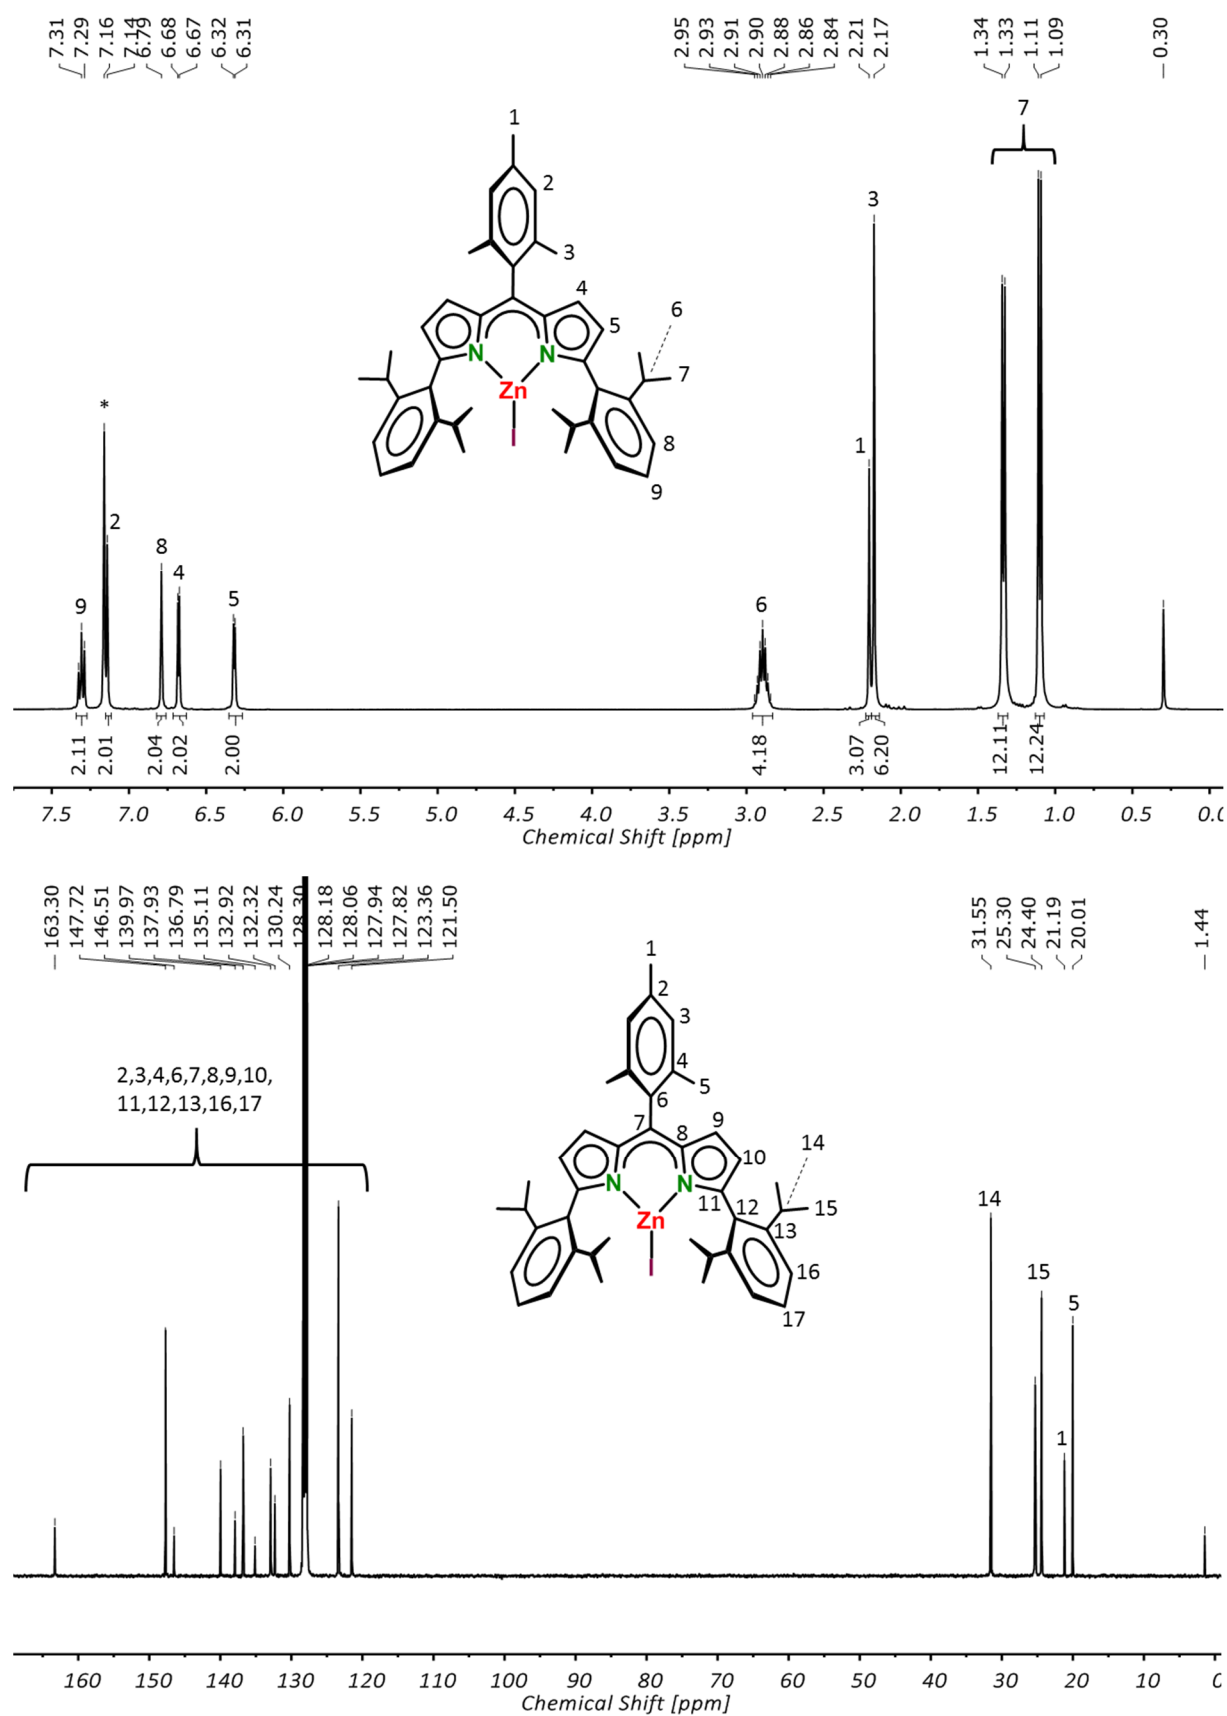

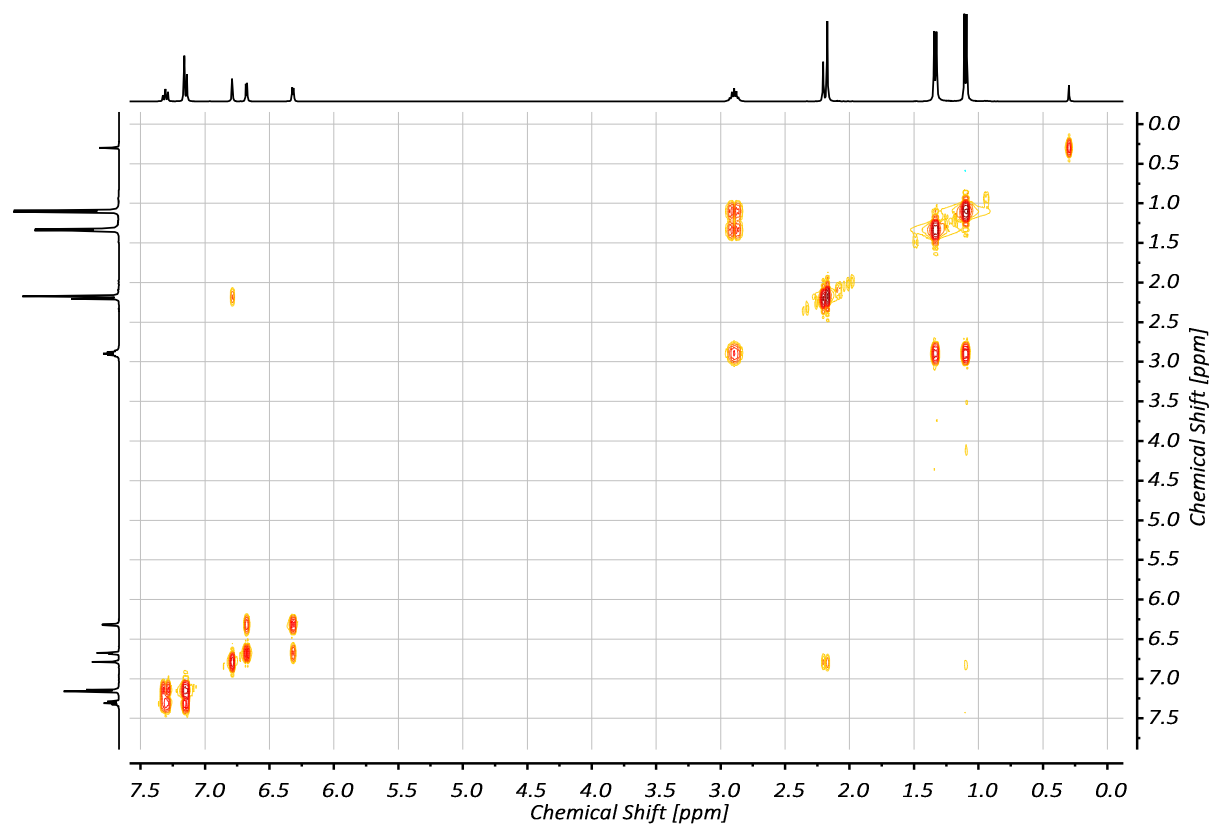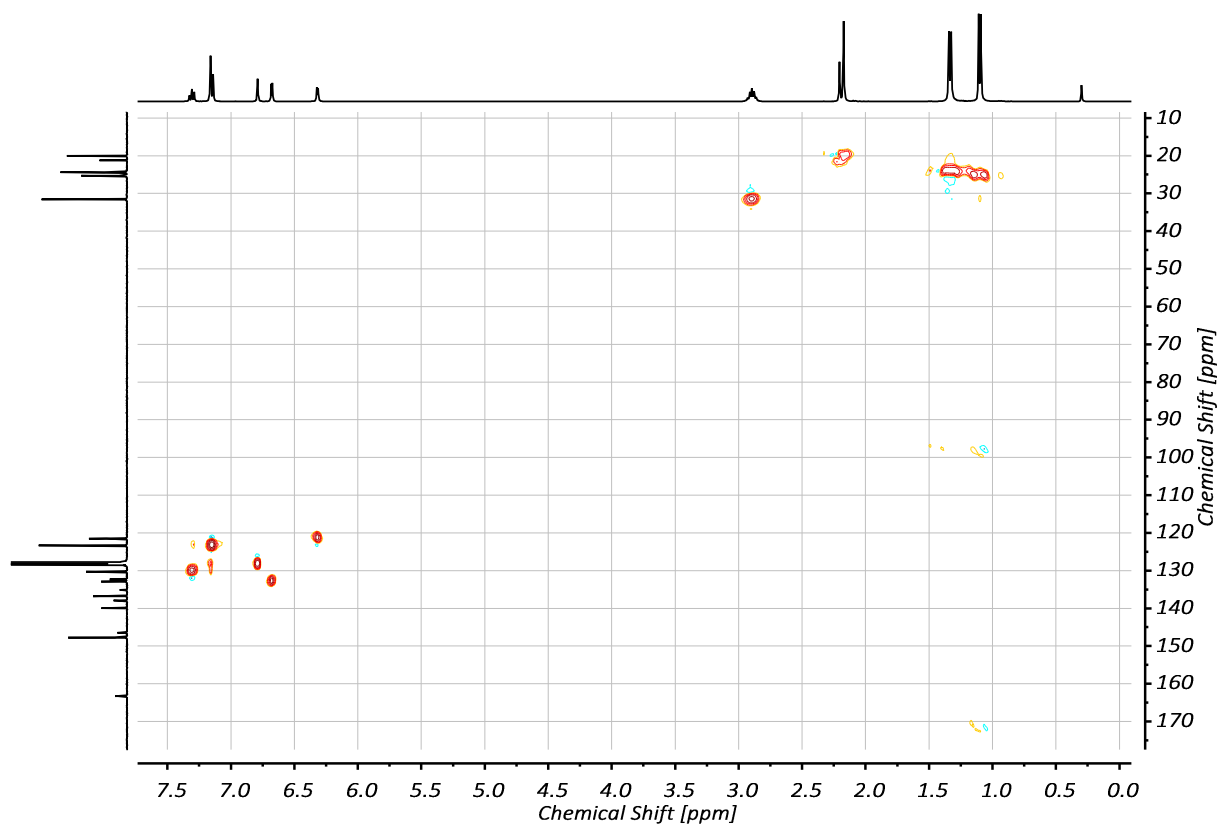

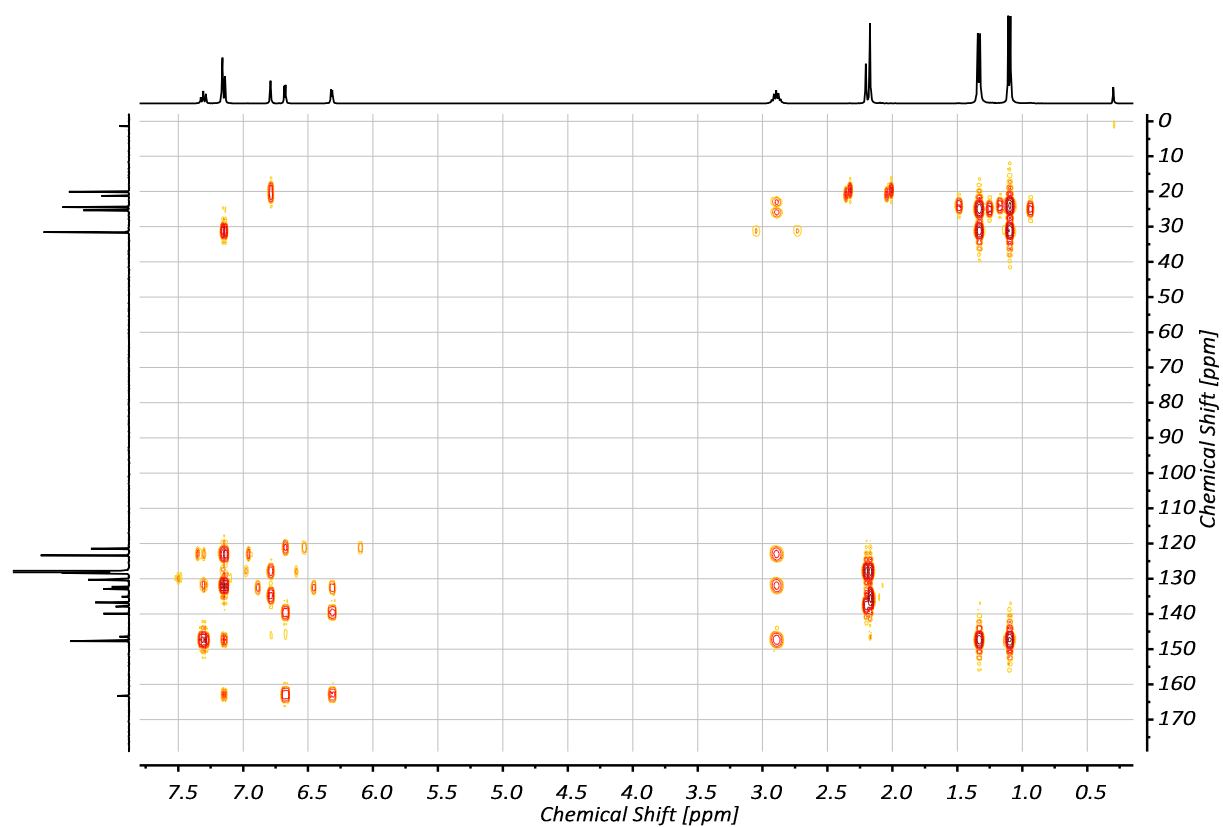

**Figure S11.**  $^1\text{H}$ ,  $^{13}\text{C}$ , COSY, HSQC and HMBC spectra of ( $^{\text{DIP}}\text{DPM}$ )ZnH (**6**) in benzene- $d_6$  (\*).

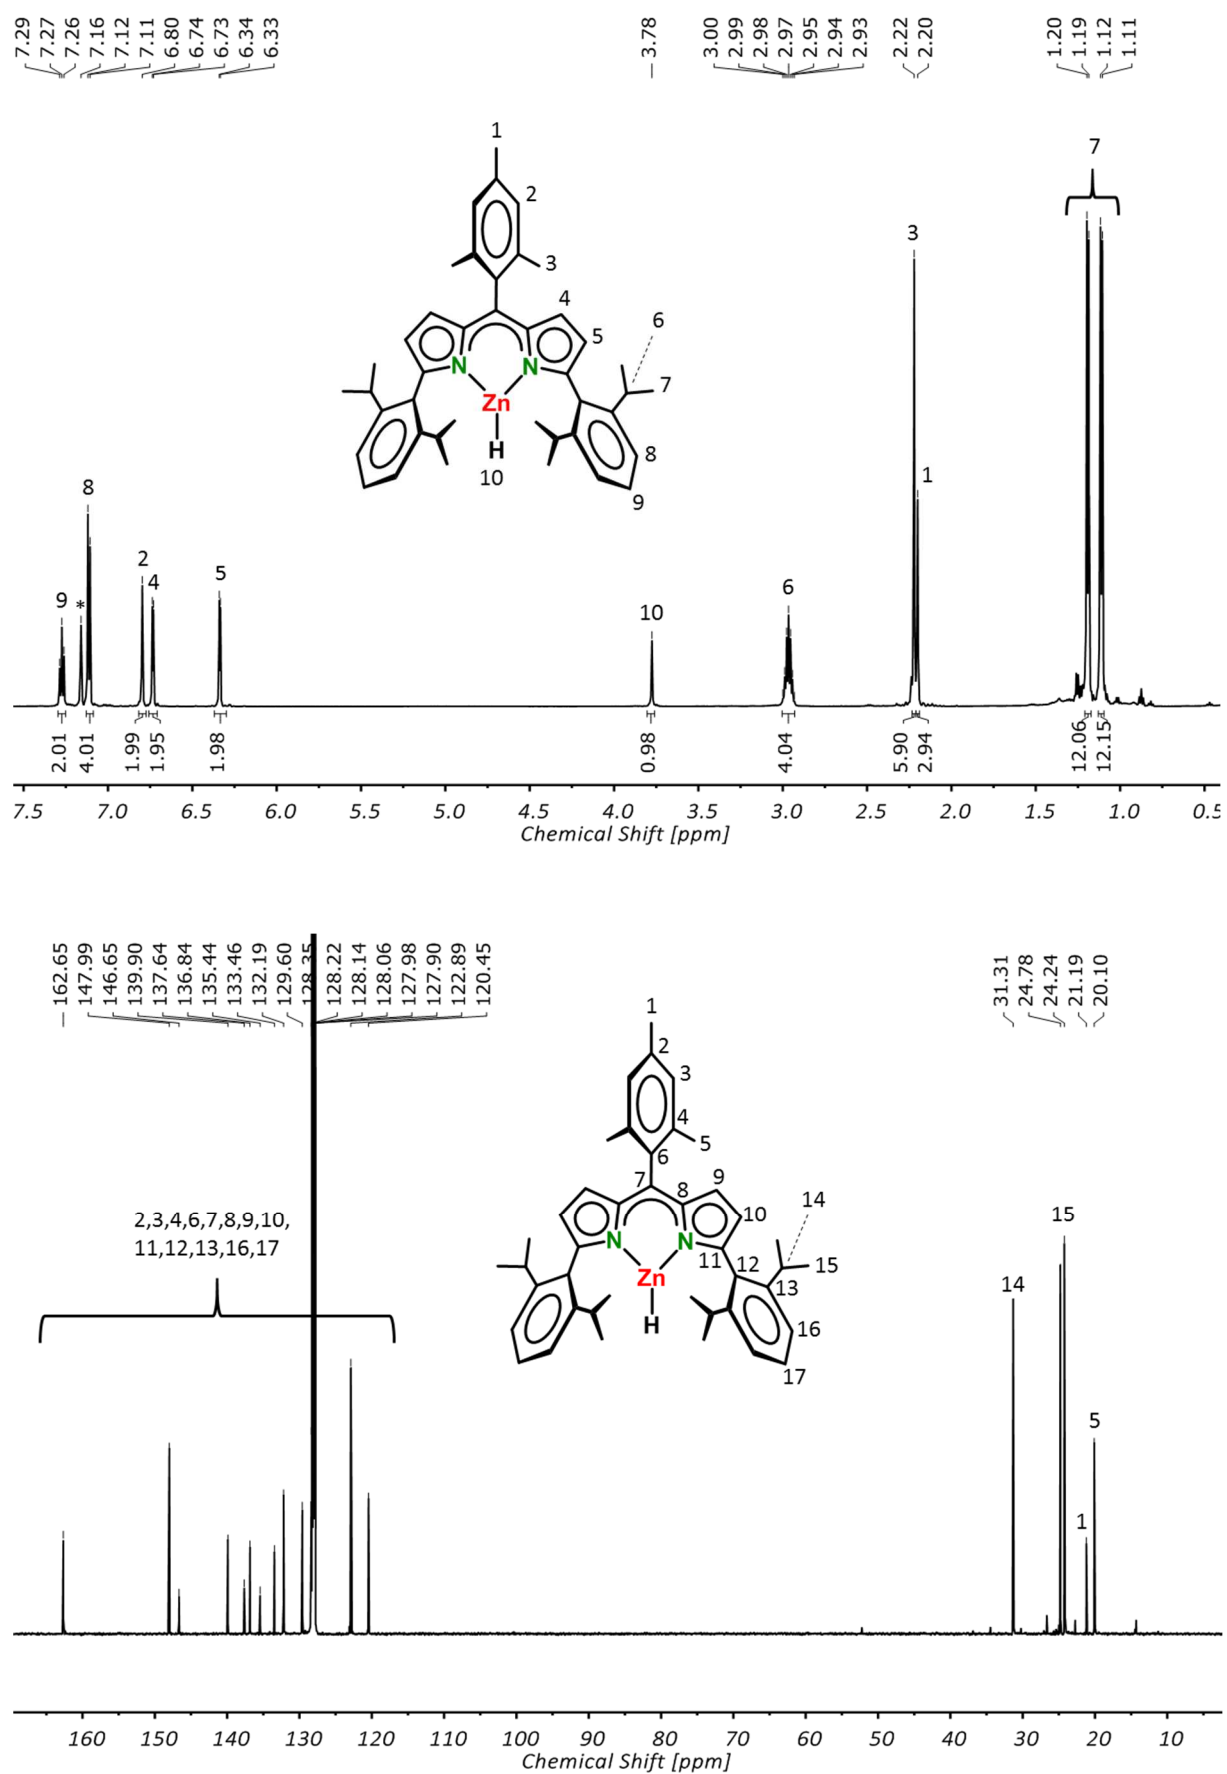

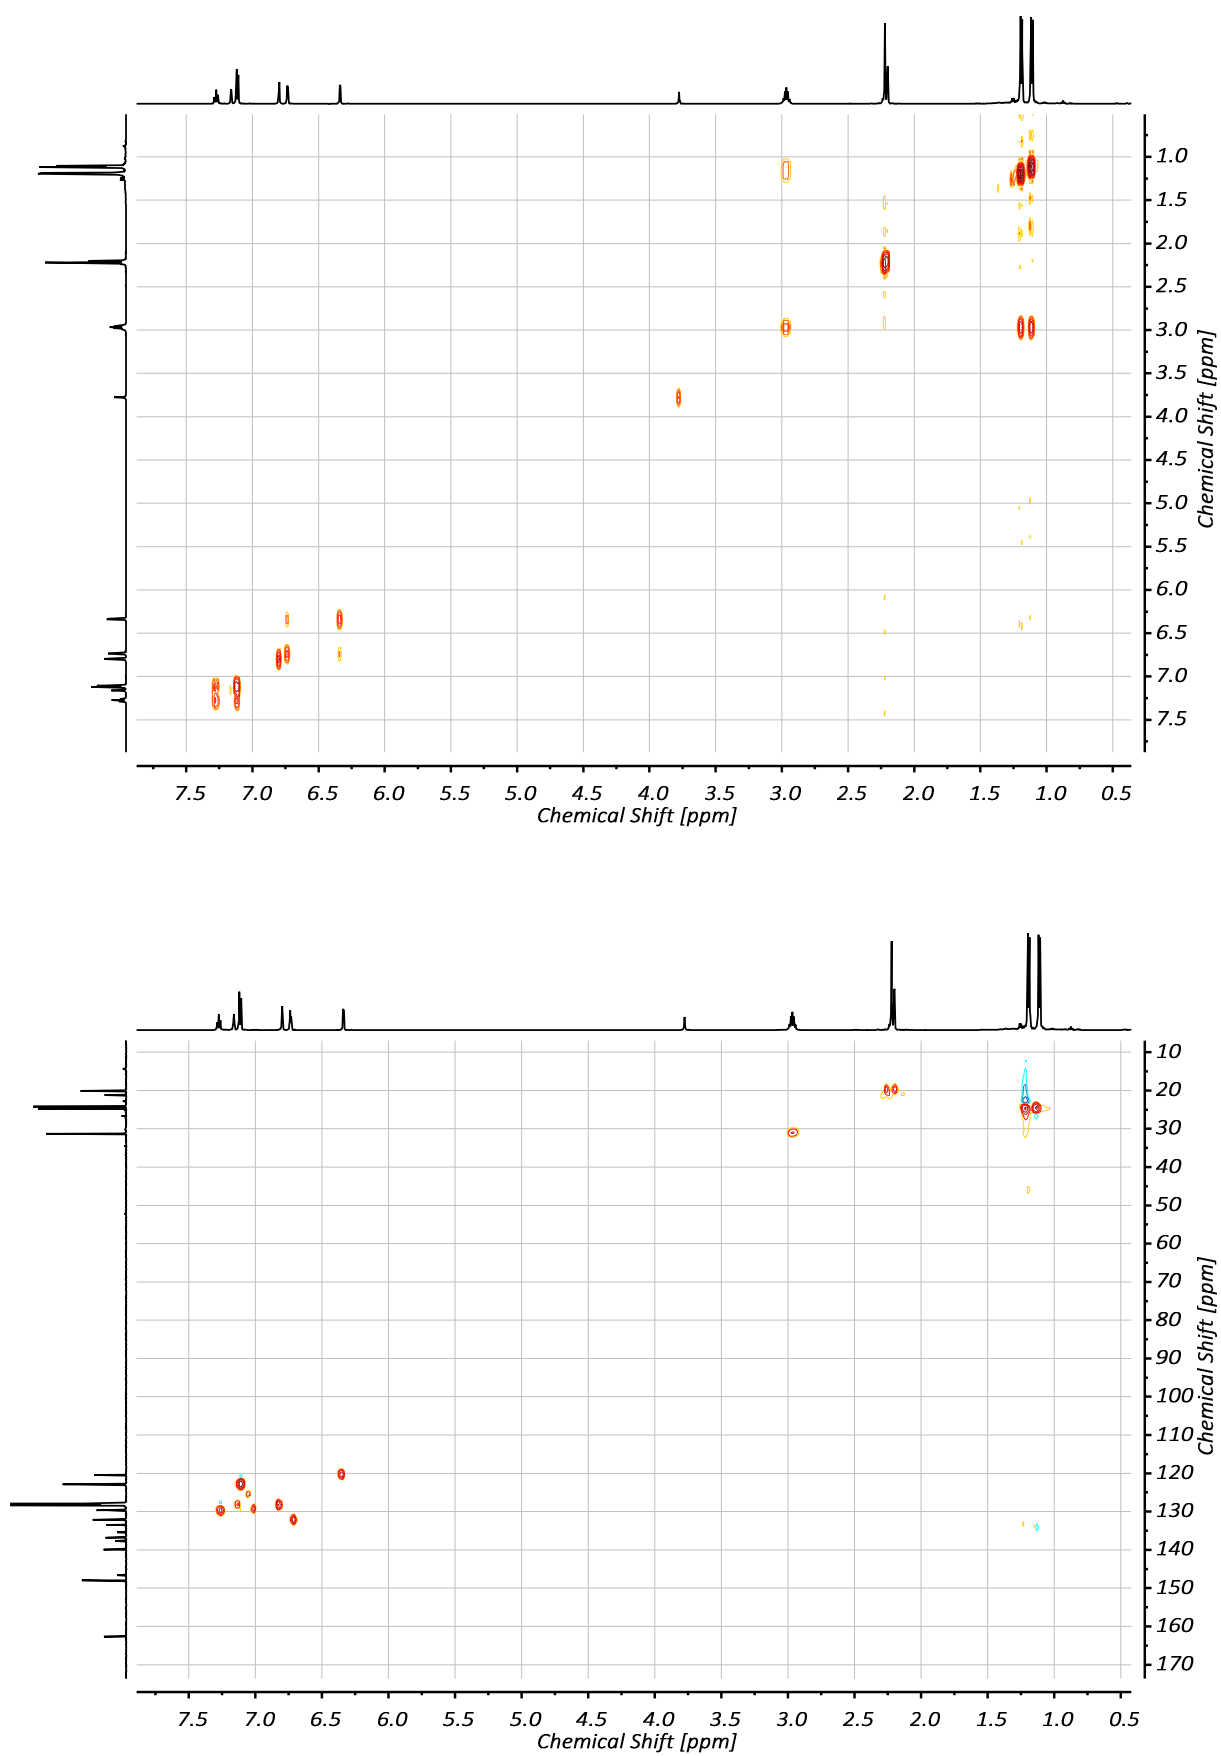

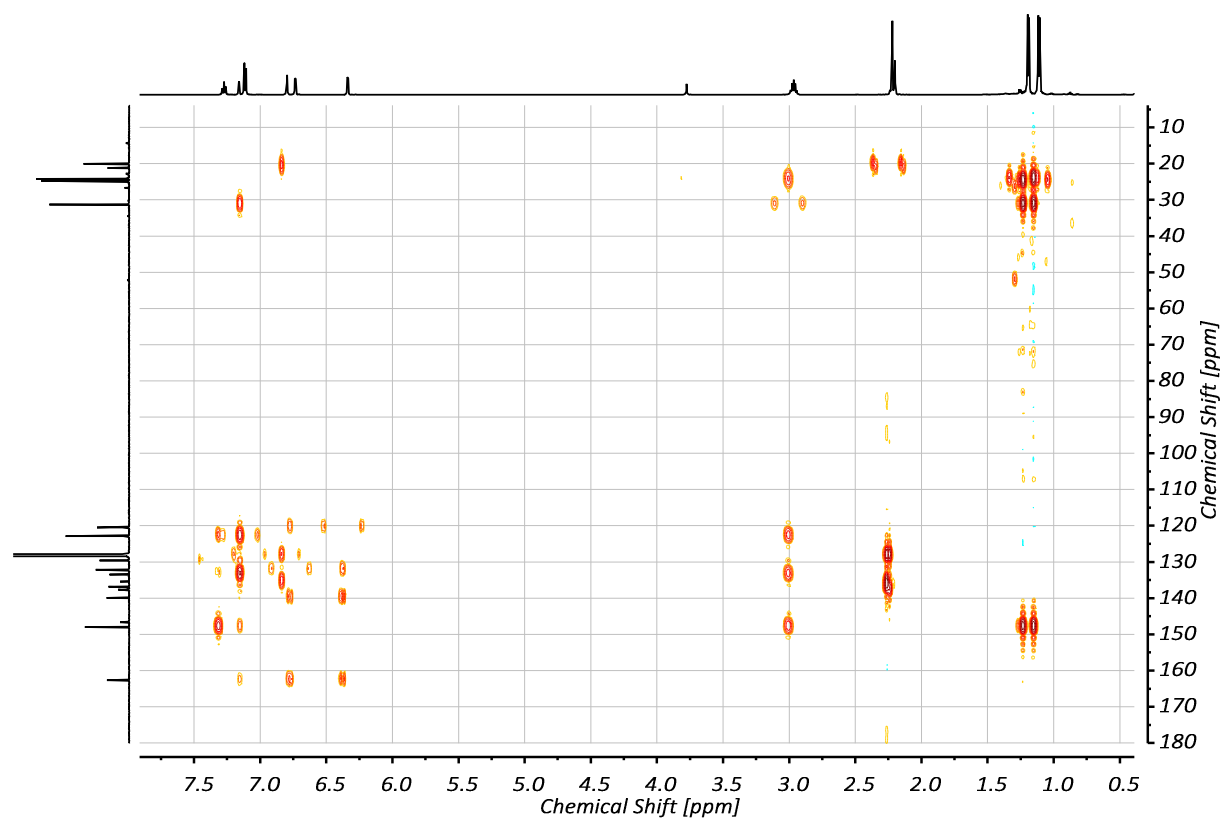

**Figure S12.**  $^1\text{H}$ ,  $^{13}\text{C}$ , COSY, HSQC and HMBC spectra of ( $^{\text{DIPP}}$ DPM)Zn(O<sub>2</sub>CH) (**7**) in benzene-*d*<sub>6</sub> (\*).

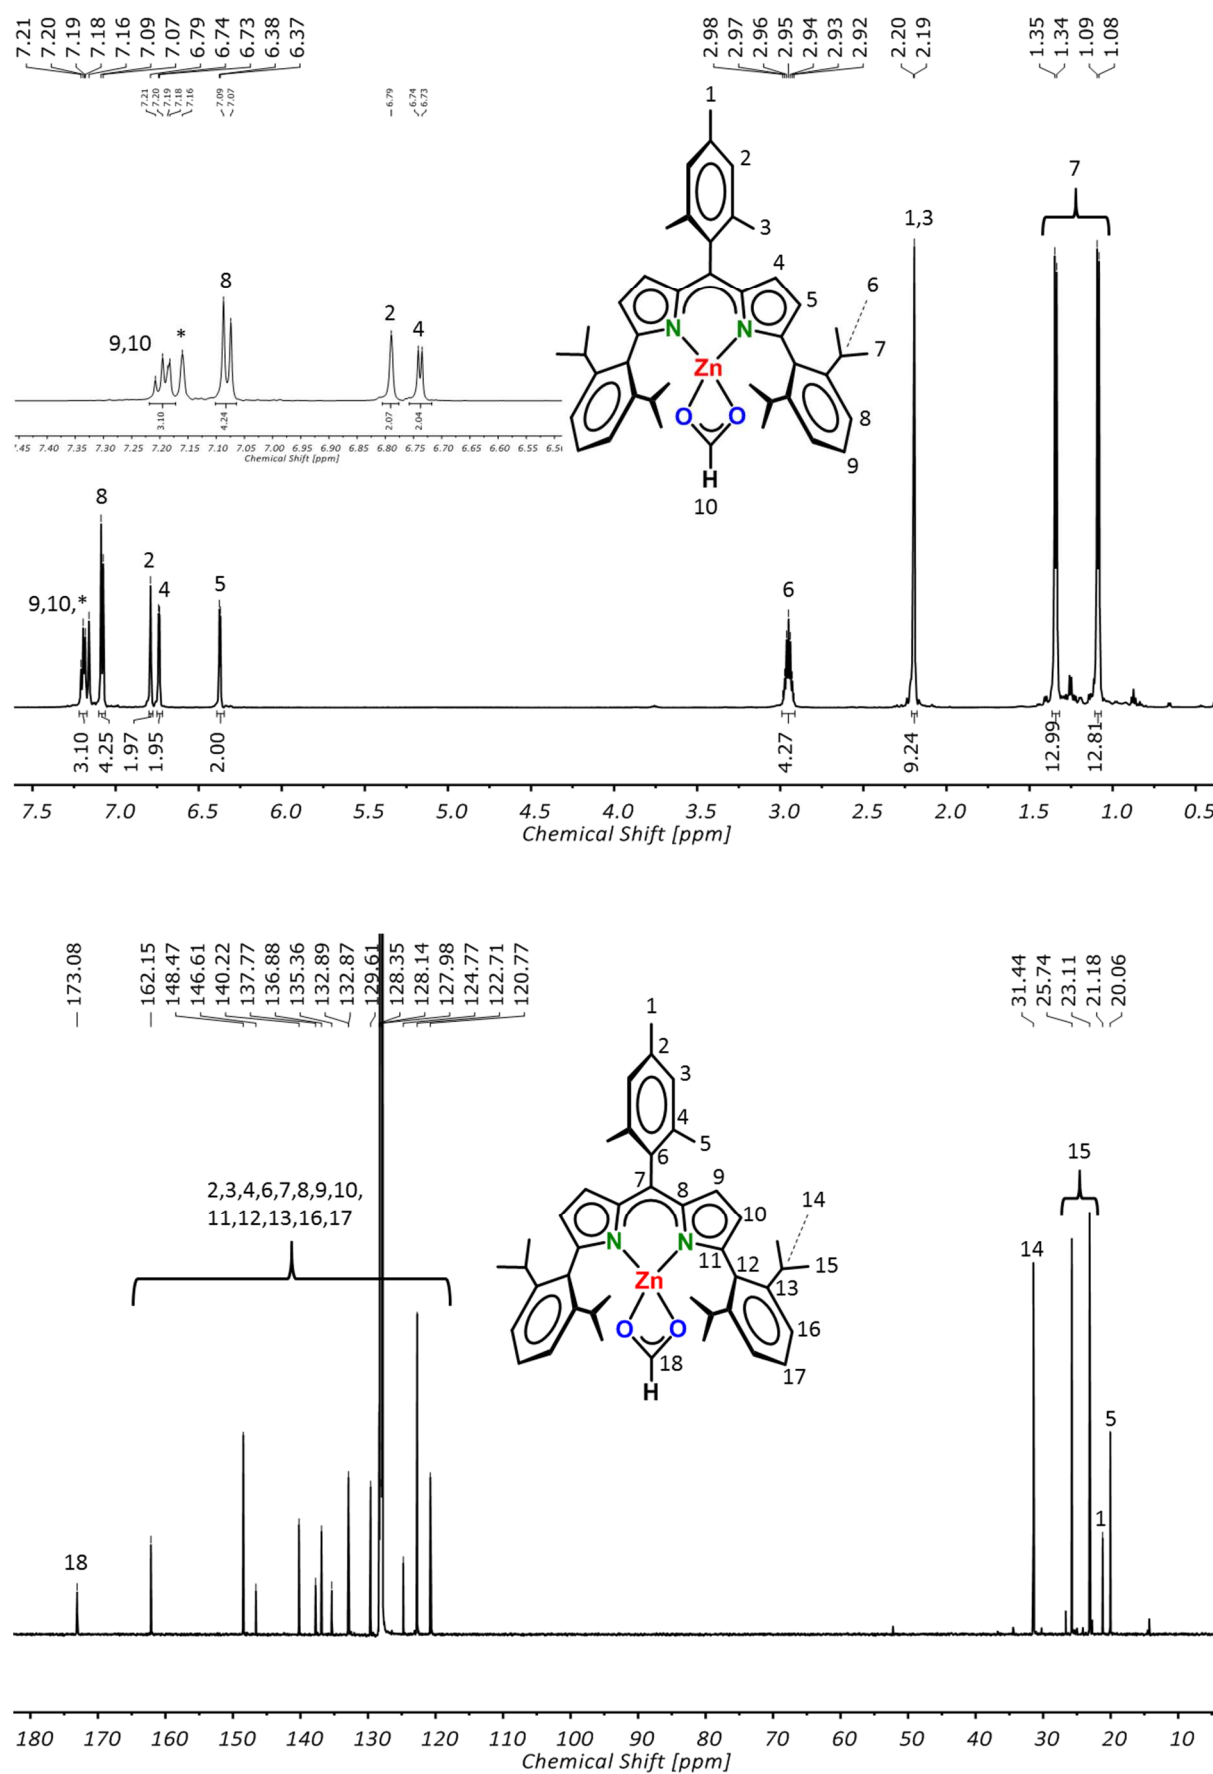



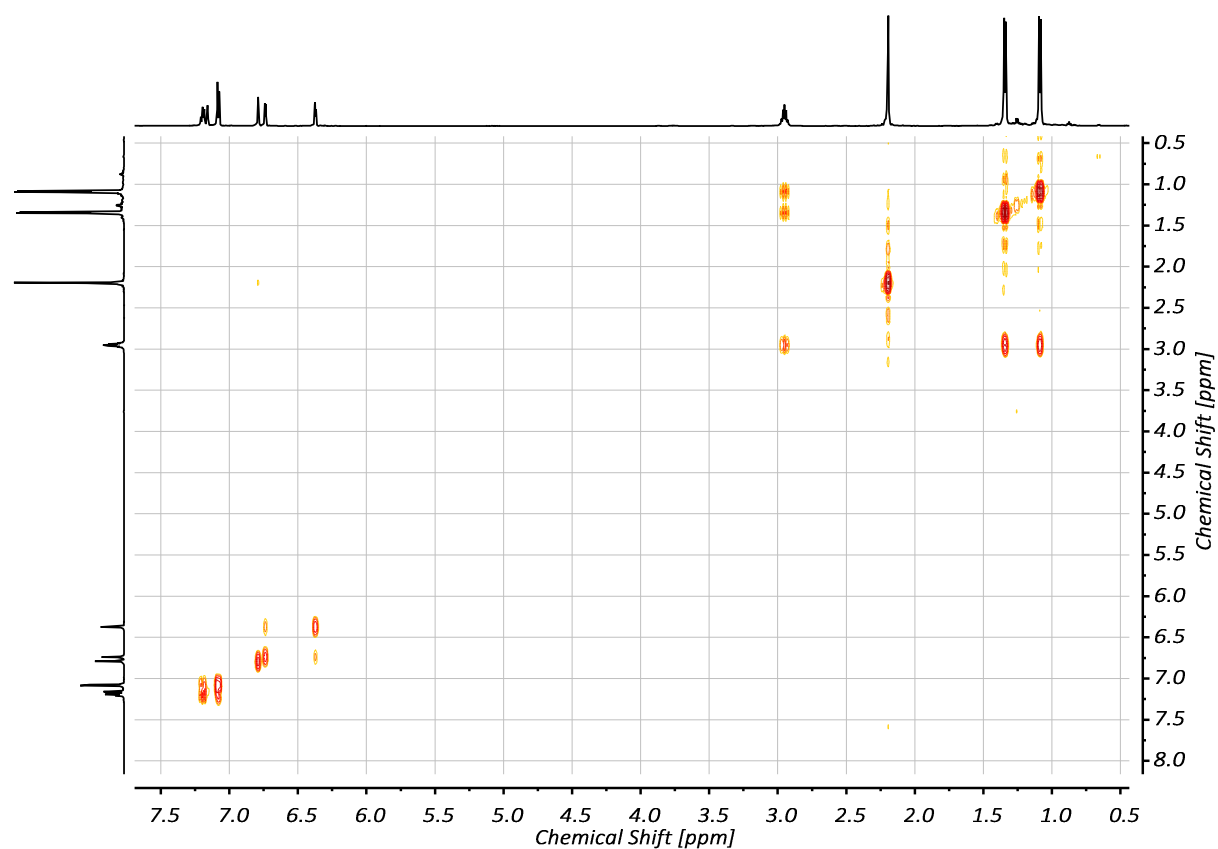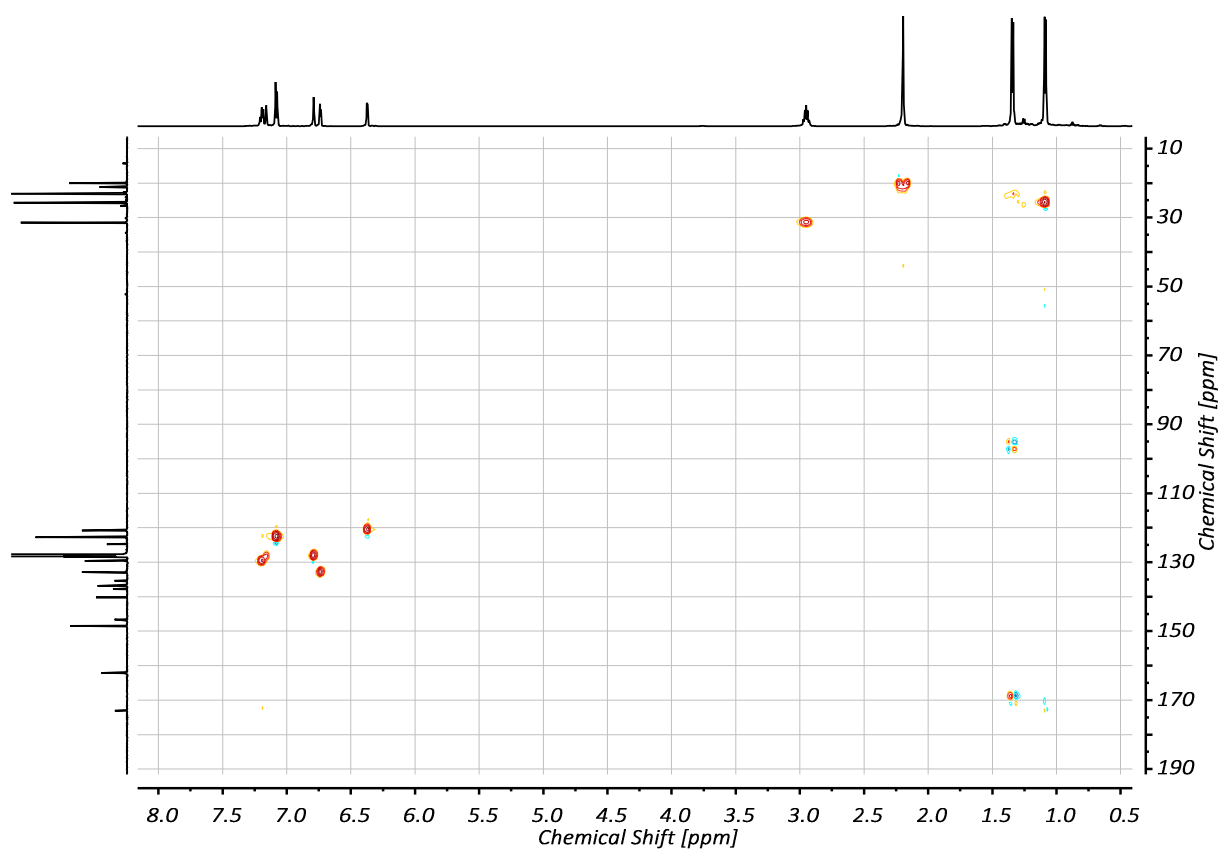

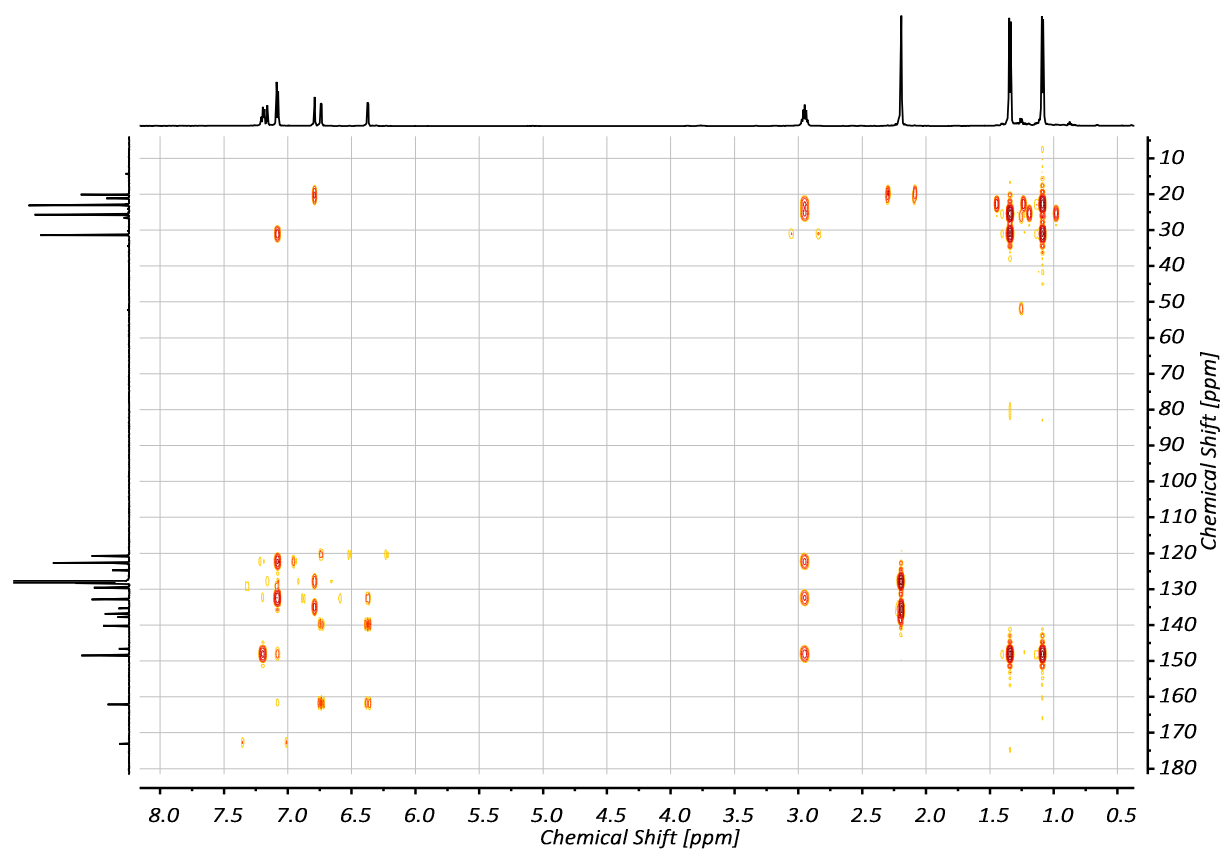

**Figure S13.** Temperature dependent  $^1\text{H}$ -NMR spectra ( $^{\text{DIPP}}$ DPM)ZnH (**6**) in toluene- $d_8$ .

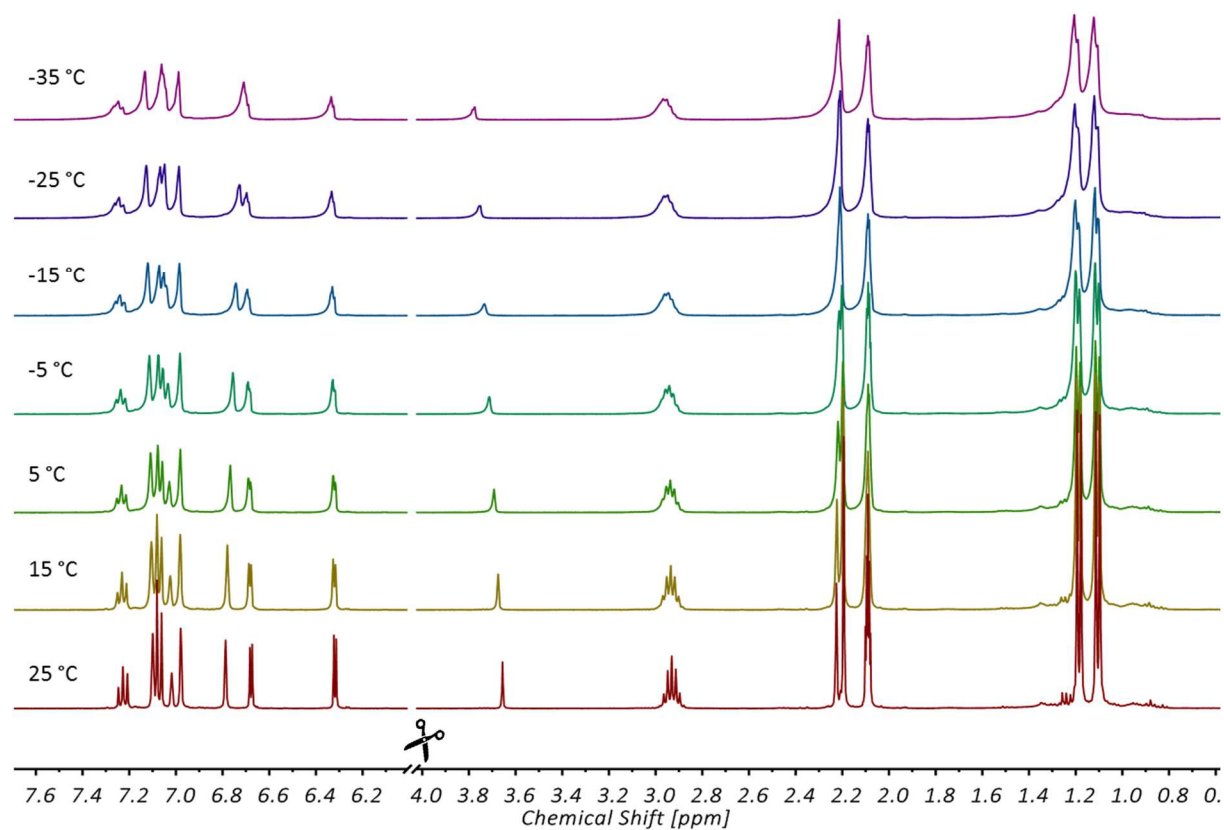

**Figure S14.** Temperature dependent  $^1\text{H}$ -NMR spectra ( $^{\text{DIPP}}$ DPM)ZnO<sub>2</sub>CH (**7**) in toluene- $d_8$ .

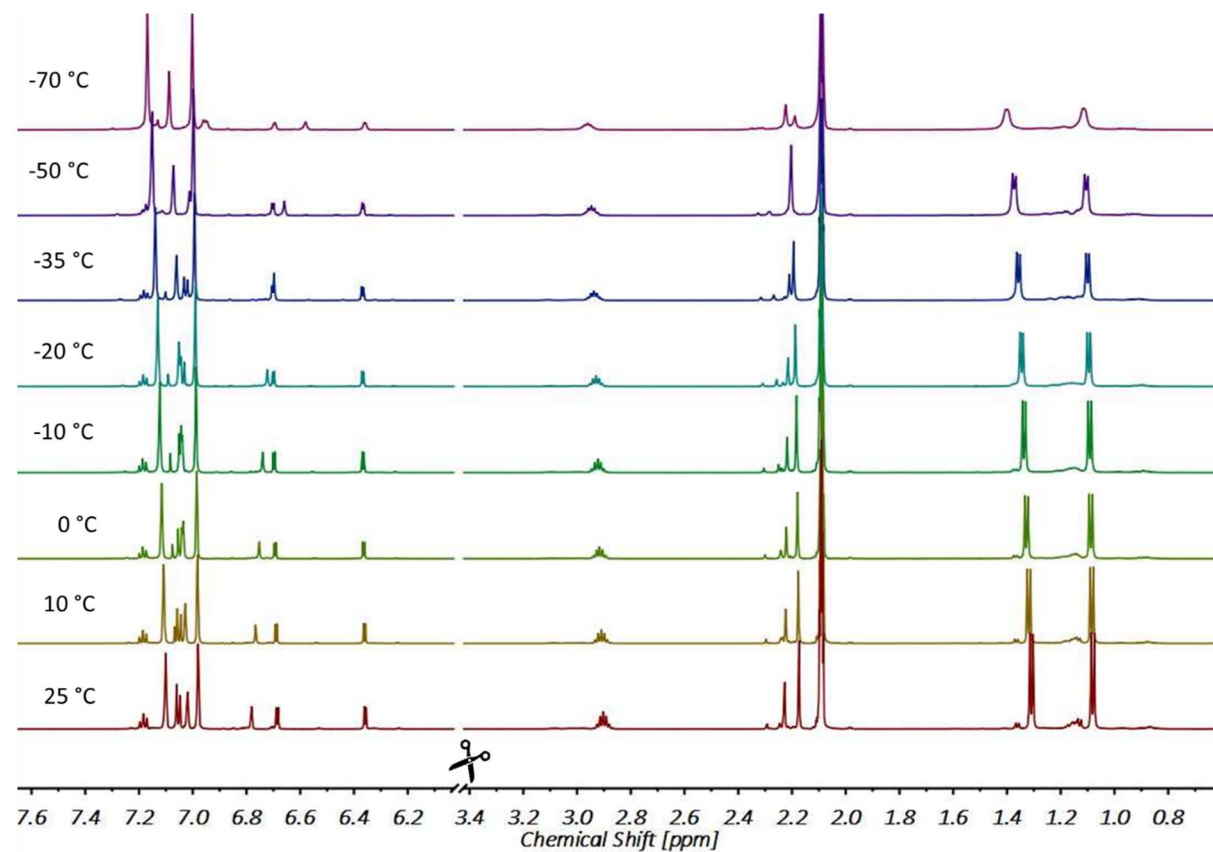

## Diffusion-Ordered-Spectroscopy (DOSY)

**Table S6.** DOSY parameter for (<sup>D15</sup>PDP)ZnH (**6**) and (<sup>D15</sup>PDP)ZnO<sub>2</sub>CH (**7**) in benzene-*d*<sub>6</sub>.

| Compound                                 | Formula                                                          | D [m <sup>2</sup> /s]   | MW <sup>Exp.</sup><br>Monomer<br>[g/mol] | MW <sup>Calc.</sup><br>Monomer<br>[g/mol] |
|------------------------------------------|------------------------------------------------------------------|-------------------------|------------------------------------------|-------------------------------------------|
| ( <sup>D15</sup> PDP)ZnH                 | C <sub>42</sub> H <sub>50</sub> N <sub>2</sub> Zn                | 5,738*10 <sup>-10</sup> | 631                                      | 648                                       |
| ( <sup>D15</sup> PDP)ZnO <sub>2</sub> CH | C <sub>43</sub> H <sub>50</sub> N <sub>2</sub> O <sub>2</sub> Zn | 5,661*10 <sup>-10</sup> | 591                                      | 691                                       |

Diffusion measurements were conducted on a Bruker AVANCE NMR spectrometer operating at 600.13 MHz for proton resonance equipped with a 5 mm PABDO BB/19F-1H/D probe with Z-GRD and actively shielded gradient coil with a maximum gradient strength of 5.3500094 G/mm (at 10 A).

Parameter optimization was carried out empirically employing the pulse programme ledbpgp2s1D using stimulated echo and LED (D21 = 5 ms, longitudinal eddy current delay as a Z-filter) with bipolar gradient pulses (P30) and two spoiling gradients (P19 = 600 μs) leading to values for gradient pulse length (P30 = 1250 μs, in case of bipolar gradients *little DELTA*\*0.5) and diffusion time (D20 = 60 ms, *big DELTA*). Delay for gradient recovery was set to 200 μs.

The diffusion experiment was executed with variable gradients from 2% to 98% gradient strength with 32 increment values (difframp calculated with the AU-program *DOSY*). In this case the pulse program ledbpgp2s was applied for data acquiring of this pseudo-2D Experiment. Data processing was performed with the T1/T2 software package (SimFit) of TopSpin (version 3.2, Bruker Biospin) by fitting area data (integration of all peaks of interest of the same molecule) of diffusion decays. From these Stejskal-Tanner fitting curves calculated diffusion constants were obtained and assimilated statistically.

For molecular weight estimation Stalke's method was applied (external calibration curves **ECC**'s under assumption of DSE-shaped molecules (dissipated spheres and ellipsoides) with residual signal of deuterated benzene as internal reference with normalized diffusion coefficients.<sup>5,6</sup>

#### 4) Selected infrared spectra

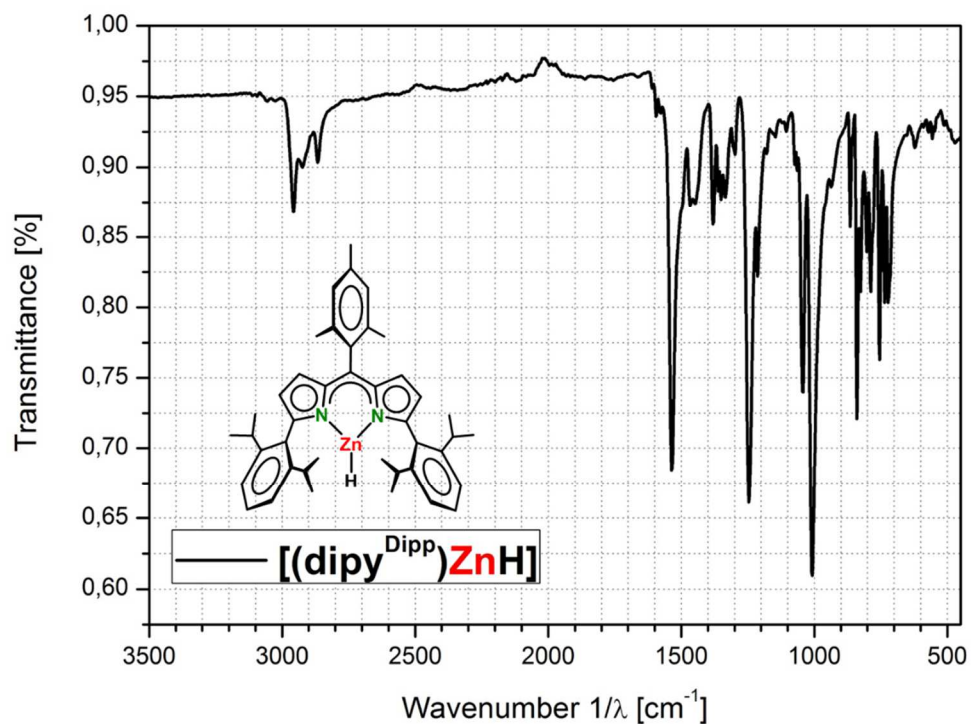

**Figure S15.** Infrared spectrum of  $(^{\text{DIPP}}\text{DPM})\text{ZnH}$  (**6**).

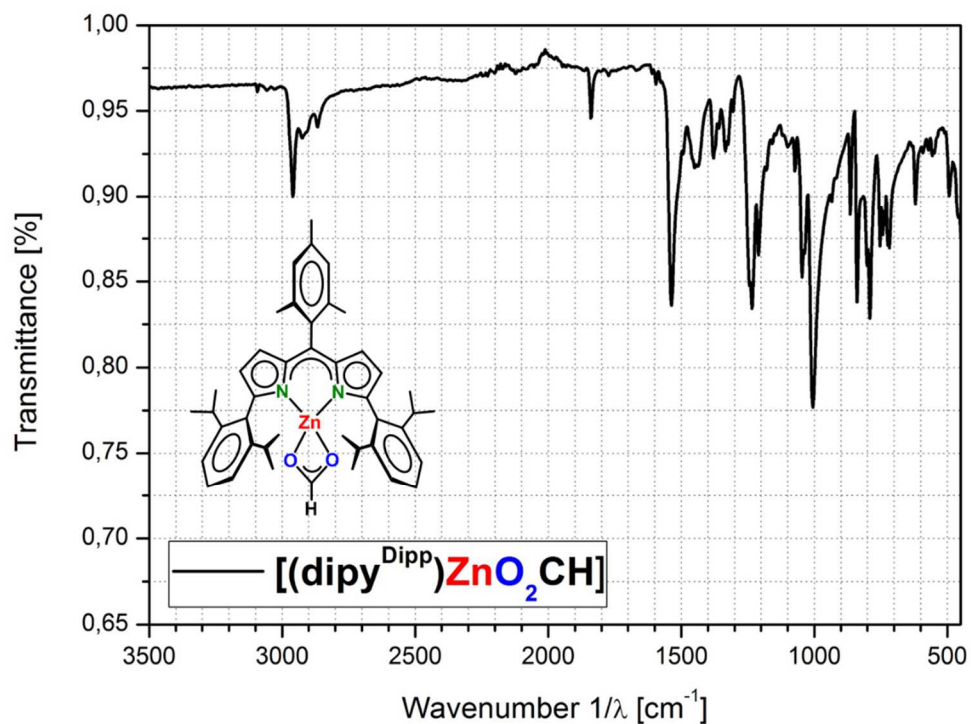

**Figure S16.** Infrared spectrum of  $(^{\text{DIPP}}\text{DPM})\text{ZnO}_2\text{CH}$  (**7**).

#### 4) Catalytic experiments

##### Experimental procedure

In a nitrogen-filled glovebox, a 10 mL high-pressure reactor was charged with (<sup>DIPP</sup>DPM)ZnH (37 mg, 0.057 mmol, 1.0 eq) and (EtO)<sub>3</sub>SiH (0.38 g, 2.3 mmol, 40 eq.). The reactor was taken out of the glovebox, pressurized with 10 bars of CO<sub>2</sub> and sealed. The reaction mixture in the reactor was stirred vigorously at 90 °C for 5h. The reactor was placed in cold water to cool down and excess CO<sub>2</sub> was released. The reaction mixture was analyzed by NMR and GC-MS. Under the given reaction conditions, HSi(OEt)<sub>3</sub> partially disproportionated into SiH<sub>4</sub> and Si(OEt)<sub>4</sub>. The conversion of (EtO)<sub>3</sub>SiH and the yields of H<sub>3</sub>COSi(OEt)<sub>3</sub>, HCO<sub>2</sub>Si(OEt)<sub>3</sub> and Si(OEt)<sub>4</sub> (or that of its disproportionation products) were determined by quantitative <sup>13</sup>C NMR.<sup>7</sup>

**Figure S17.**  $^1\text{H}$  and quantitative  $^{13}\text{C}$  NMR spectra of the products of  $\text{CO}_2$  hydrosilylation with  $(^{\text{DIP}}\text{DPM})\text{ZnH}$  (**6**) in benzene- $d_6$ .

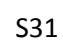

**Figure S18.**  $^1\text{H}$  and quantitative  $^{13}\text{C}$  NMR spectra of the products of  $\text{CO}_2$  hydrosilylation with  $(^{\text{DIP}}\text{BDI})\text{ZnH}$  (II) in benzene- $d_6$ .

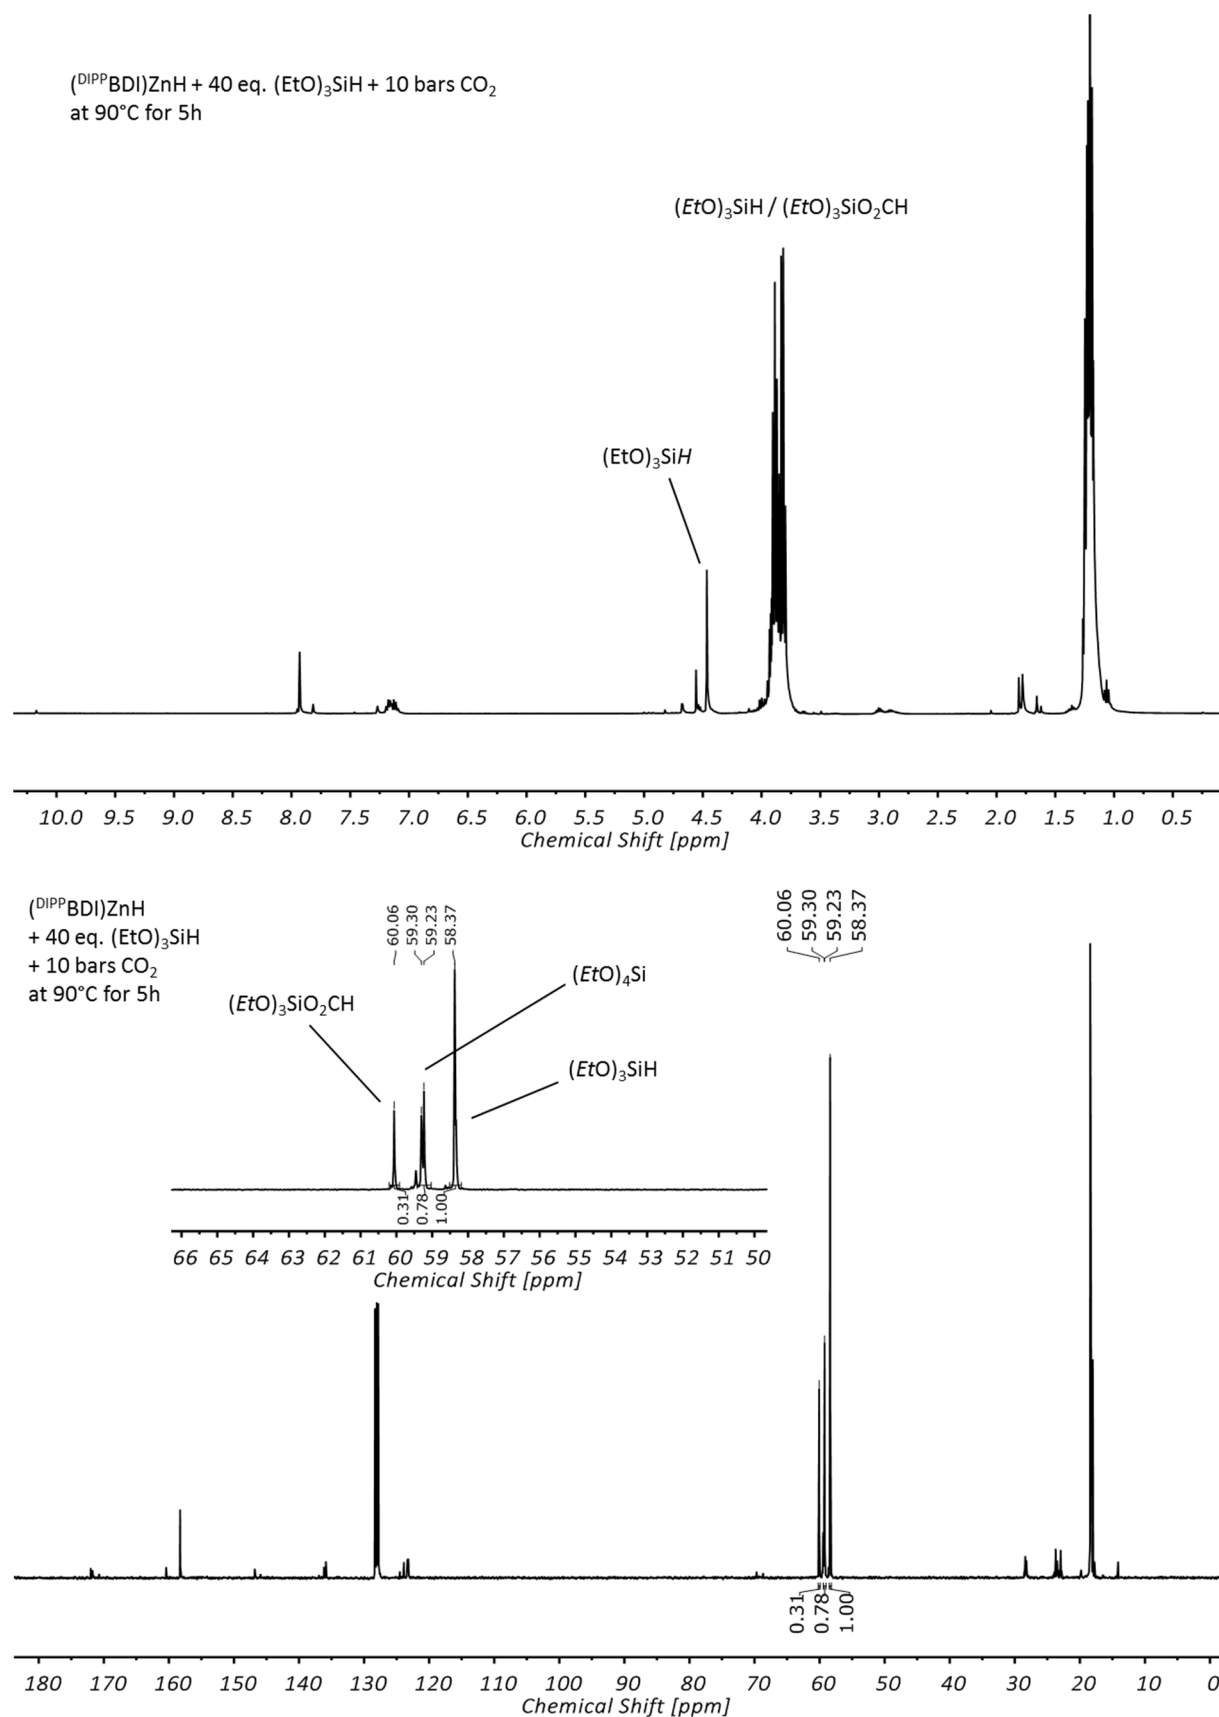



## GC-MS measurements

GC-MS measurements were performed on a Thermo Scientific™ Trace™ 1310 gas chromatography system (carrier gas Helium) with detection by a Thermo Scientific™ ISQ™ LT Single Quadrupole mass spectrometer. A Phenomenex® ZebronTMZB-5 GC column of the dimensions 0.25mm x 30m with a film thickness of 0.25 µm was used. The samples (1 µL) were injected with an Instant Connect-SSL Module in the split mode (injector temperature: 280 °C). Temperature programs were started at 40 °C followed by heating ramps, optimized for the separation problem, until 280°. Baseline separation of each analyte was achieved by choosing the different temperature programs.

The molecular formulas were assigned by comparison with entries in the NIST/EPA/NIH mass spectral library (version 2.2, built June 10 2014). Retention time and mass spectra of redistilled (EtO)<sub>3</sub>SiH (received from Alpha Aesar in 96% purity) were verified by GC-MS measurements.

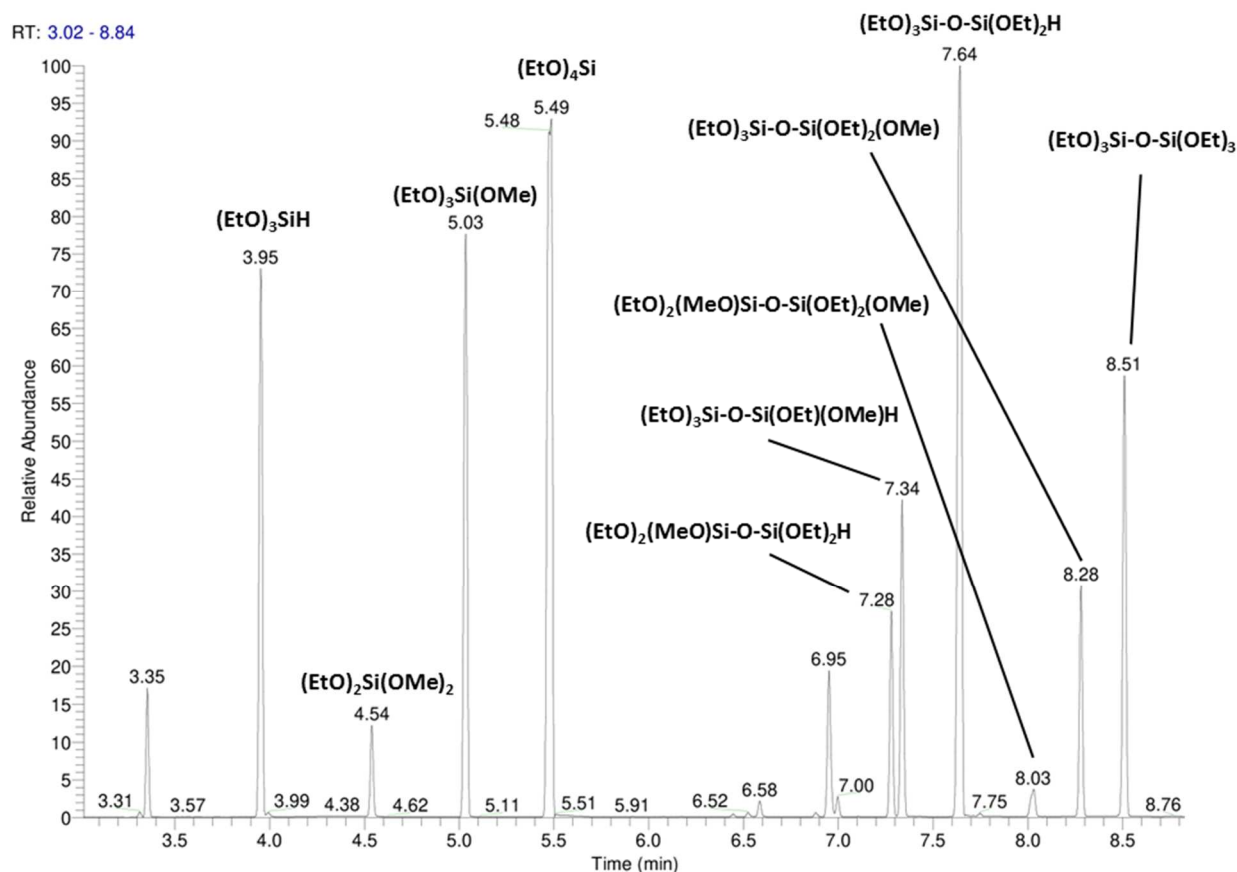

**Figure S19.** Chromatogram of products formed by catalytic conversions with  $(^{\text{DIPP}}\text{DPM})\text{ZnH}$  (**6**). Depicted retention times correspond to a highly concentrated sample. All spectrometric data given below derive from diluted samples to ensure prevention of incorrect data from saturated peaks.

GC-MS (EI-MS, 70 eV): m/z (%): RT: 3.95 min  $(\text{EtO})_3\text{SiH}$ : 163.08 (78)  $[\text{M}]^+$ , 149.07 (100), 119.07 (95), 91.03 (47).

GC-MS (EI-MS, 70 eV): m/z (%): RT: 5.03 min  $(\text{EtO})_3\text{Si}(\text{OMe})$ : 193.09 (5)  $[\text{M}]^+$ , 179.06 (100), 149.07 (58), 135.06 (82), 105.05 (34).

GC-MS (EI-MS, 70 eV): m/z (%): RT: 5.48 min  $(\text{EtO})_4\text{Si}$ : 207.10 (5)  $[\text{M}]^+$ , 193.07 (87), 179.07 (31), 163.07 (51), 149.07 (100), 135.07 (7), 119.06 (41).

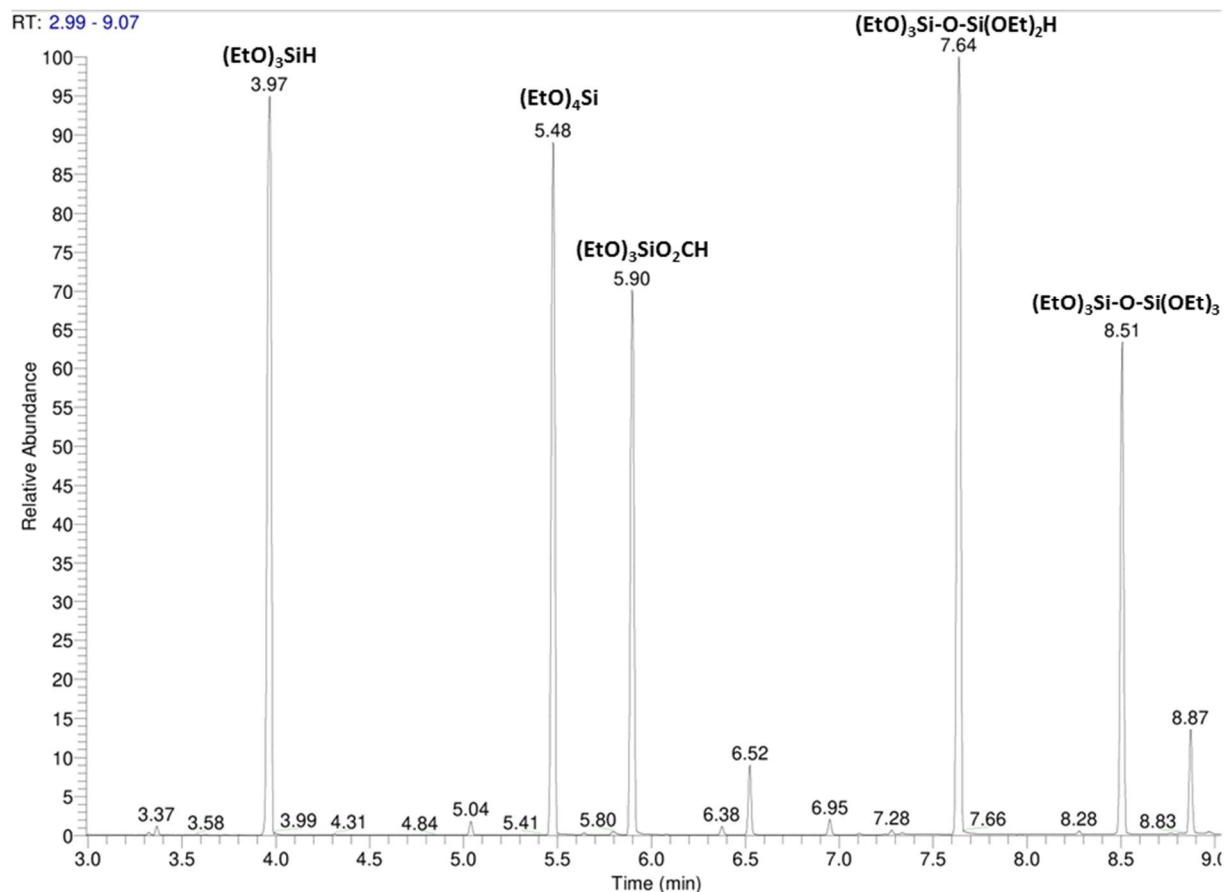

**Figure S20.** Chromatogram of products formed by catalytic conversions with  $(^{\text{DIPP}}\text{BDI})\text{ZnH}$  (**II**). Depicted retention times correspond to a highly concentrated sample. All spectrometric data given below derive from diluted samples to ensure prevention of incorrect data from saturated peaks.

GC-MS (EI-MS, 70 eV): m/z (%): RT: 3.97 min  $(\text{EtO})_3\text{SiH}$ : 163.08 (87)  $[\text{M}]^+$ , 149.05 (100), 119.06 (97), 105.04 (78), 91.04 (46).

GC-MS (EI-MS, 70 eV): m/z (%): RT: 5.48 min  $(\text{EtO})_4\text{Si}$ : 207.10 (6)  $[\text{M}]^+$ , 193.07 (100), 179.07 (36), 149.06 (97), 135.04 (22), 119.05 (40).

GC-MS (EI-MS, 70 eV): m/z (%): RT: 5.90 min  $(\text{EtO})_3\text{SiO}_2\text{CH}$ : 207.04 (2)  $[\text{M}]^+$ , 193.06 (7), 179.03 (13), 163.03 (100), 135.01 (53), 107.01 (26).

## 5) Theoretical calculations

All calculations were carried out using Gaussian 09 Rev. D.<sup>8</sup> All methods were used as implemented. All structures were fully optimized as true minima on a B3PW91/6-311++G\*\* level of theory and characterized as true minima (NIMAG=0) by frequency calculations on the same level of theory.<sup>9-12</sup> Charges were calculated by NBO analysis.<sup>13</sup> Structures were drawn and evaluated using Molecule V2.3.<sup>14</sup>

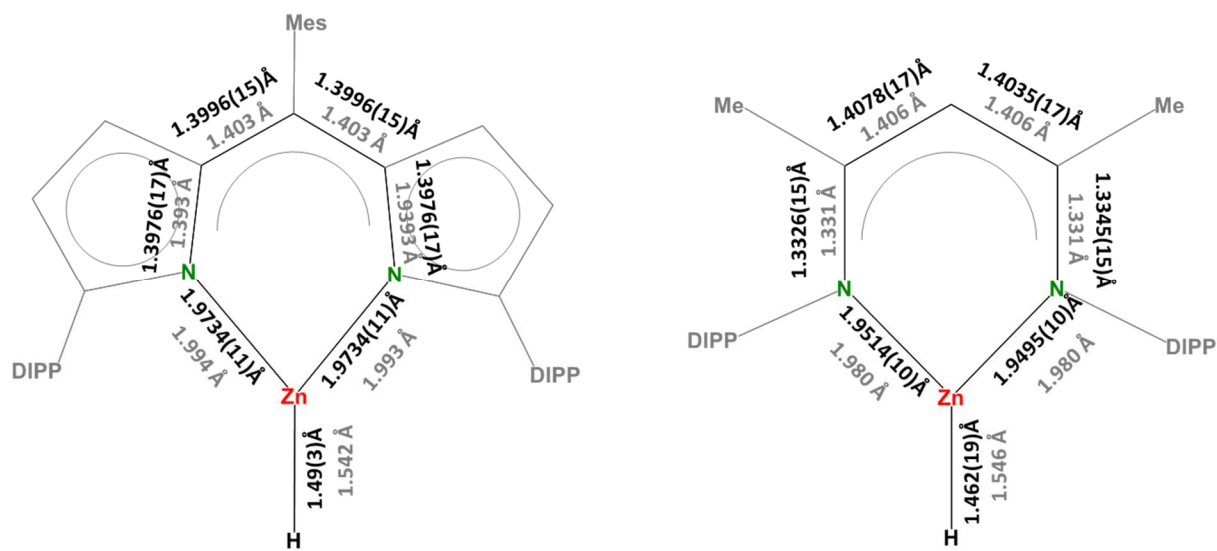

**Figure S21.** Comparison of calculated geometries (grey) with crystal structures (black):  $(^{DIPP}DPM)ZnH$  (left) and  $(^{DIPP}BDI)ZnH$  (right). The Zn-H distances in the crystal structure are substantially shorter than the calculated values. This is due to the fact that the maximum of the H electron density does not coincide with its nucleus.

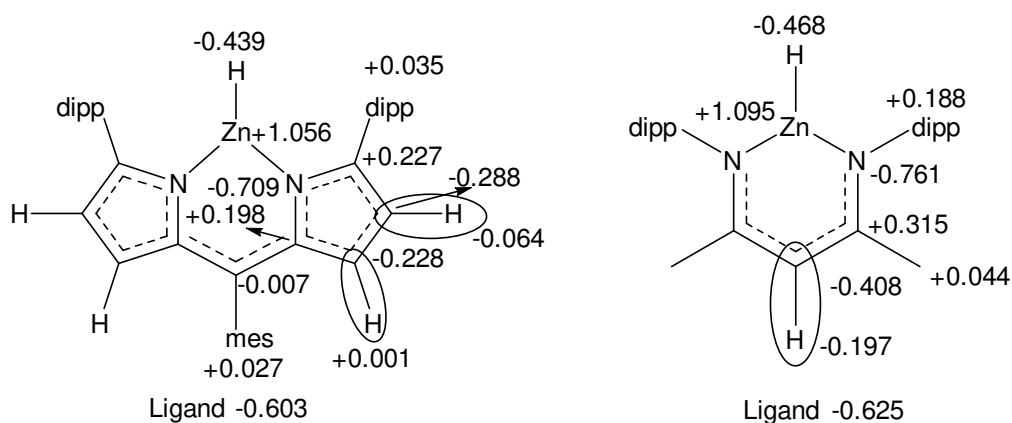

**Figure S22.** Distribution of NPA charges in  $(^{DIPP}DPM)ZnH$  (left) and  $(^{DIPP}BDI)ZnH$  (right).

## 5) References

- 1 Rigaku Oxford Diffraction, **2018**, CrysAlisPro Software system, version 1.171.39.46, Rigaku Corporation, Oxford, UK.
- 2 Dolomanov, O. V.; Bourhis, L. J.; Gildea, R. J.; Howard, J. A. K.; Puschmann, H. OLEX2: a complete structure solution, refinement and analysis program. *J. Appl. Cryst.*, **2009**, *42*, 339-341.
- 3 Sheldrick, G. M. Crystal structure refinement with SHELXL. *Acta Cryst. A*, **2015**, *71*, 3-8.
- 4 Sheldrick, G. M. A short history of SHELX. *Acta Cryst.* **2008**, *A64*, 112-122.
- 5 Neufeld, R.; Stalke, D. Accurate molecular weight determination of small molecules via DOSY-NMR by using external calibration curves with normalized diffusion coefficients. *Chem. Sci.* **2015**, *6*, 3354-3364.
- 6 Bachmann, S.; Neufeld, R.; Dzemski, M.; Stalke, D. New External Calibration Curves (ECCs) for the Estimation of Molecular Weights in Various Common NMR Solvents. *Chem. Eur. J.* **2016**, *22*, 8462-8465.
- 7 Caytan, E.; Remaud, G. S.; Tenailleau, E.; Akoka, S. Precise and Accurate Quantitative  $^{13}\text{C}$  NMR with Reduced Experimental Time. *Talanta* **2007**, *71*, 1016-1021.
- 8 Frisch, M. J.; Trucks, G. W.; Schlegel, H. B.; Scuseria, G. E.; Robb, M. A.; Cheeseman, J. R.; Scalmani, G.; Barone, V.; Mennucci, B.; Petersson, G. A.; Nakatsuji, H.; Caricato, M.; Li, X.; Hratchian, P. H.; Izmaylof, A. F.; Bloino, J.; Zheng, G.; Sonnenberg, J. L.; Hada, M.; Ehara, M.; Toyota, K.; Fukuda, R.; Hasegawa, J.; Ishida, M.; Makajima, T.; Honda, Y.; Kitao, O.; Nakai, H.; Vreven, T.; Montgomery, J. A.; Peralta, J. E.; Ogilaro, F.; Bearpark, M.; Heyd, E.; Brothers, J. J.; Kudin, K. N.; Staroverov, V. N.; Keith, T.; Kobayashi, R.; Normand, J.; Raghavachari, K.; Rendell, A.; Burant, J. C.; Iyengar, S. S.; Tomasi, J.; Cossi, M.; Rega, N.; Millam, J. M.; Klene, M.; Knox, J. E.; Cross, J. E.; Bakken, V.; Adamo, C.; Jaramillo, J.; Gomperts, R.; Stratmann, R. E.; Yazyev, O.; Austin, A. J.; Cammi, R.; Pomelli, C.; Ochterski, J. W.; Martin, R. L.; Morokuma, K.; Zakrzewski, V. G.; Voth, G. A.; Salvador, P.; Dannenberg, J. J.; Dapprich, S.; Daniels, A. D.; Farkas, O.; Foresman, J. B.; Ortiz, J. V.; Cioslowski, J.; Fox, D. J. Gaussian, *Gaussian Inc.*, Wallingford CT, **2013**.
- 9 Becke, A. D. A new mixing of Hartree-Fock and local-density-functional theories. *J. Chem. Phys.* **1993**, *98*, 1372-1377.
- 10 Perdew, J. P. *Electronic Structure of Solids*, Akademie Verlag, Berlin, **1991**.
- 11 Hehre, W. J.; Radom, L.; Schleyer, P. v. R.; Pople, J. A. Ab Initio Molecular Orbital Theory, *John Wiley*, New York, **1986**, 548pp.
- 12 Clark, T.; Chandrasekhar, J.; Spitznagel, G. W.; Schleyer, P. v. R. Efficient diffuse function-augmented basis sets for anion calculations. III. The 3-21 + G basis set for first-row elements, lithium to fluorine. *J. Comp. Chem.* **1983**, *4*, 294-301.

- 13 Reed, A. E.; Weinstock, R. B.; Weinhold, F. Natural population analysis. *J. Chem. Phys.* **1985**, *83*, 735-746.
- 14 Van Eikema Hommes, N. *Molecule*, Erlangen, **2016**.
